# Supplementary material for: Characterization and photocatalytic behavior of 2,9-di(aryl)-1,10-phenanthroline copper(i) complexes
Source: Royal Society of Chemistry journal article supplement (doi:10.1039/c7dt00400a), 2017-01-01
Supplement: c7dt00400a1.pdf [file c7dt00400a1.pdf]

**Electronic Supplementary Information (ESI) for**

**“Characterization and photocatalytic behavior of 2,9-di(aryl)-1,10-phenanthroline copper(I) complexes”**

M. Mustafa Cetin,<sup>1</sup> Roman T. Hodson,<sup>1</sup> C. Robin Hart,<sup>1</sup> David B. Cordes,<sup>2</sup> Michael Findlater,<sup>1</sup> Dominick J. Casadonte, Jr.,<sup>1</sup> Anthony F. Cozzolino,<sup>1</sup> Michael F. Mayer\*<sup>1</sup>

---

<sup>1</sup> Department of Chemistry and Biochemistry, Texas Tech University, MS – 41061, Lubbock, TX 79409, USA, Fax: 001 806 742 1289; Tel: 001 806 834 3689; E-mail: mf.mayer@ttu.edu

<sup>2</sup> EaStCHEM School of Chemistry, University of St. Andrews, St. Andrews, KY16 9ST, U.K.

## Table of Contents

|                                                                                                                                                              |        |
|--------------------------------------------------------------------------------------------------------------------------------------------------------------|--------|
| <sup>1</sup> H NMR and <sup>13</sup> C NMR Spectra, Assigned Protons, Chemical Shifts and Δδ Data.....                                                       | S4-9   |
| Figure S1. <sup>1</sup> H NMR spectrum of [Cu·(1) <sub>2</sub> ]PF <sub>6</sub> .....                                                                        | S4     |
| Figure S2. <sup>13</sup> C NMR spectrum of [Cu·(1) <sub>2</sub> ]PF <sub>6</sub> .....                                                                       | S4     |
| Figure S3. <sup>1</sup> H NMR spectrum of [Cu·(2) <sub>2</sub> ]PF <sub>6</sub> .....                                                                        | S5     |
| Figure S4. <sup>13</sup> C NMR spectrum of [Cu·(2) <sub>2</sub> ]PF <sub>6</sub> .....                                                                       | S5     |
| Figure S5. <sup>1</sup> H NMR spectrum of [Cu·(3) <sub>2</sub> ]PF <sub>6</sub> .....                                                                        | S6     |
| Figure S6. <sup>13</sup> C NMR spectrum of [Cu·(3) <sub>2</sub> ]PF <sub>6</sub> .....                                                                       | S6     |
| Figure S7. <sup>1</sup> H NMR spectrum of [Cu·(4) <sub>2</sub> ]PF <sub>6</sub> .....                                                                        | S7     |
| Figure S8. <sup>13</sup> C NMR spectrum of [Cu·(4) <sub>2</sub> ]PF <sub>6</sub> .....                                                                       | S7     |
| Figure S9. Assigned protons on the ligands and respective complexes.....                                                                                     | S8     |
| Table S1. Chemical shifts and Δδ of <b>1</b> and [Cu·(1) <sub>2</sub> ]PF <sub>6</sub> .....                                                                 | S9     |
| Table S2. Chemical shifts and Δδ of <b>2</b> and [Cu·(2) <sub>2</sub> ]PF <sub>6</sub> .....                                                                 | S9     |
| Table S3. Chemical shifts and Δδ of <b>3</b> and [Cu·(3) <sub>2</sub> ]PF <sub>6</sub> .....                                                                 | S9     |
| Table S4. Chemical shifts and Δδ of <b>4</b> and [Cu·(4) <sub>2</sub> ]PF <sub>6</sub> .....                                                                 | S9     |
| DFT Optimized Coordinates.....                                                                                                                               | S10-22 |
| Table S5. DFT optimized coordinates of <b>1</b> .....                                                                                                        | S10    |
| Table S6. DFT optimized coordinates of <b>2</b> .....                                                                                                        | S11    |
| Table S7. DFT optimized coordinates of <b>3</b> .....                                                                                                        | S12    |
| Table S8. DFT optimized coordinates of <b>4</b> .....                                                                                                        | S13    |
| Table S9. DFT optimized coordinates of [Cu·(1) <sub>2</sub> ] <sup>+</sup> .....                                                                             | S15    |
| Table S10. DFT optimized coordinates of [Cu·(2) <sub>2</sub> ] <sup>+</sup> .....                                                                            | S17    |
| Table S11. DFT optimized coordinates of [Cu·(3) <sub>2</sub> ] <sup>+</sup> .....                                                                            | S19    |
| Table S12. DFT optimized coordinates of [Cu·(4) <sub>2</sub> ] <sup>+</sup> .....                                                                            | S22    |
| Crystallographic Data .....                                                                                                                                  | S25-47 |
| Table S13. Crystallographic data for compounds [Cu·(1) <sub>2</sub> ]PF <sub>6</sub> , <b>1</b> , <b>2</b> , and [Cu·(3) <sub>2</sub> ]PF <sub>6</sub> ..... | S25    |
| Table S14. Bond lengths [Å] and angles [°] for [Cu·(1) <sub>2</sub> ]PF <sub>6</sub> .....                                                                   | S26    |
| Table S15. Bond lengths [Å] and angles [°] for [Cu·(3) <sub>2</sub> ]PF <sub>6</sub> .....                                                                   | S35    |
| Table S16. Bond lengths [Å] and angles [°] for <b>1</b> .....                                                                                                | S41    |
| Table S17. Bond lengths [Å] and angles [°] for <b>2</b> .....                                                                                                | S45    |
| Stereoisomerism.....                                                                                                                                         | S48-50 |
| Figure S10. Representative structure of stereoisomers .....                                                                                                  | S48    |
| Figure S11. Stereosiomers .....                                                                                                                              | S48    |

|                                                                                                                                                                                                  |        |
|--------------------------------------------------------------------------------------------------------------------------------------------------------------------------------------------------|--------|
| Photocatalytic Experimental Setup and Features of LED Lights .....                                                                                                                               | S51-52 |
| Figure S12. Green LED light experimental setup .....                                                                                                                                             | S51    |
| Figure S13. Blue LED light experimental setup .....                                                                                                                                              | S51    |
| Figure S14. White light experimental setup .....                                                                                                                                                 | S52    |
| Features of LED Lights (used in photoredox) .....                                                                                                                                                | S52    |
| Possible Transitions after Different LED Light Irradiation.....                                                                                                                                  | S53    |
| Figure S15. Possible transitions with irradiation .....                                                                                                                                          | S53    |
| Figure S16. Relative emission profiles of LEDs.....                                                                                                                                              | S54    |
| Figure S17. Changes in emission intensity after initial dissolution of (a) $[\text{Cu}\cdot(\mathbf{1})_2]\text{PF}_6$ and (b) $[\text{Cu}\cdot(\mathbf{2})_2]\text{PF}_6$ in degassed DCM ..... | S55    |
| Figure S18. Emission spectra of $[\text{Cu}\cdot(\mathbf{3})_2]\text{PF}_6$ before and after exposure to air .....                                                                               | S56    |

# $^1\text{H}$ NMR and $^{13}\text{C}$ NMR Spectra

Fig. S1  $^1\text{H}$  NMR spectrum of  $[\text{Cu}(\mathbf{1})_2]\text{PF}_6$

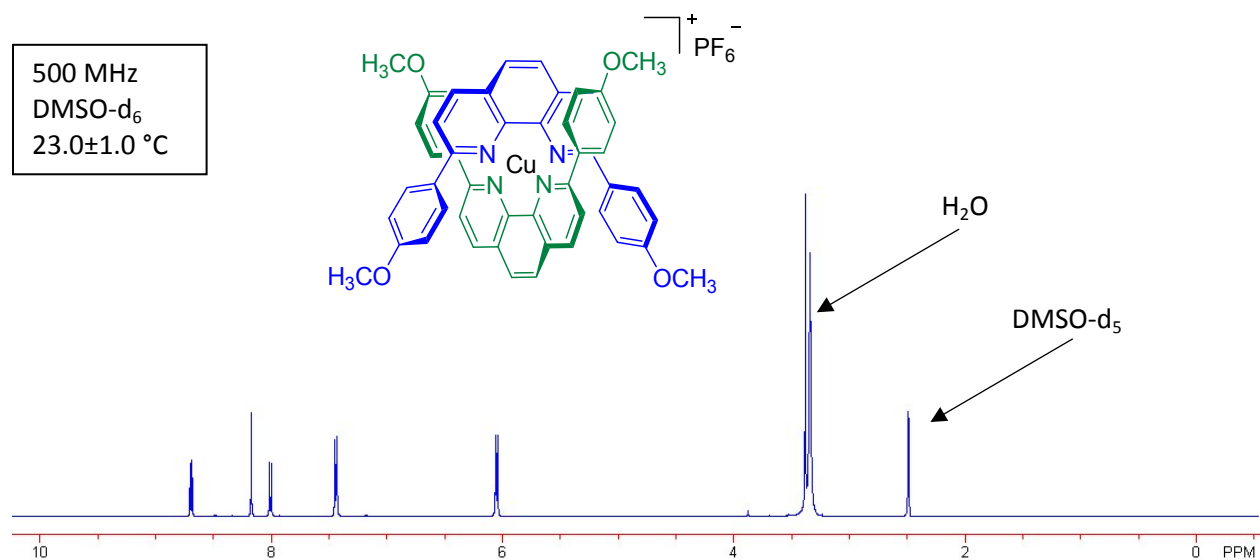

Fig. S2  $^{13}\text{C}$  NMR spectrum of  $[\text{Cu}(\mathbf{1})_2]\text{PF}_6$

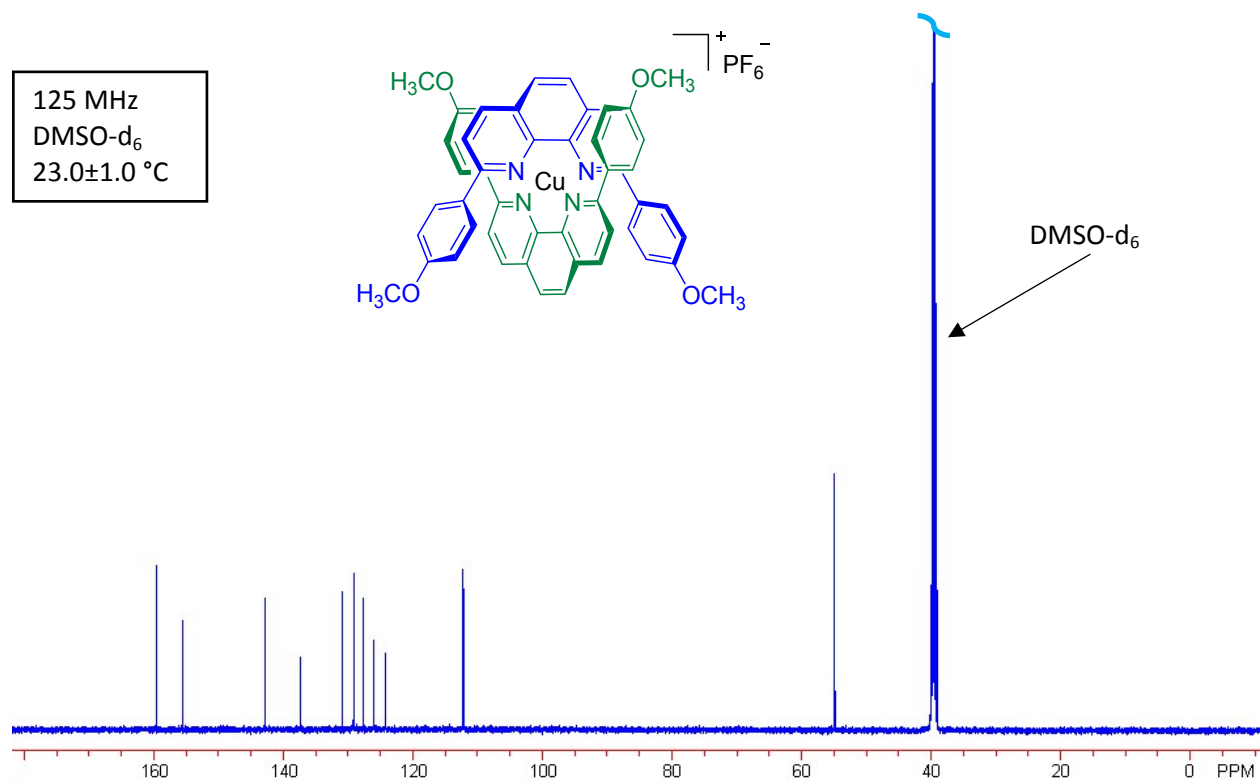

Fig. S3  $^1\text{H}$  NMR spectrum of  $[\text{Cu} \cdot (\mathbf{2})_2]\text{PF}_6$

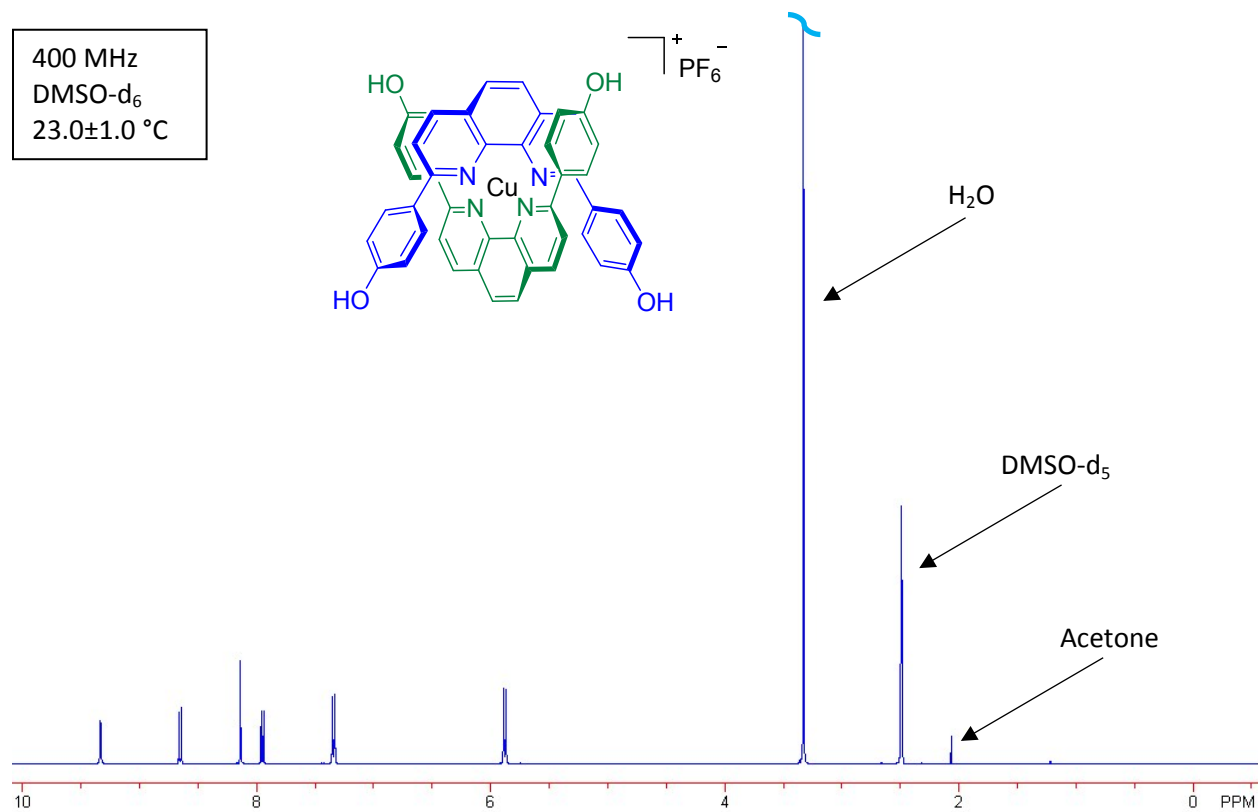

Fig. S4  $^{13}\text{C}$  NMR spectrum of  $[\text{Cu} \cdot (\mathbf{2})_2]\text{PF}_6$

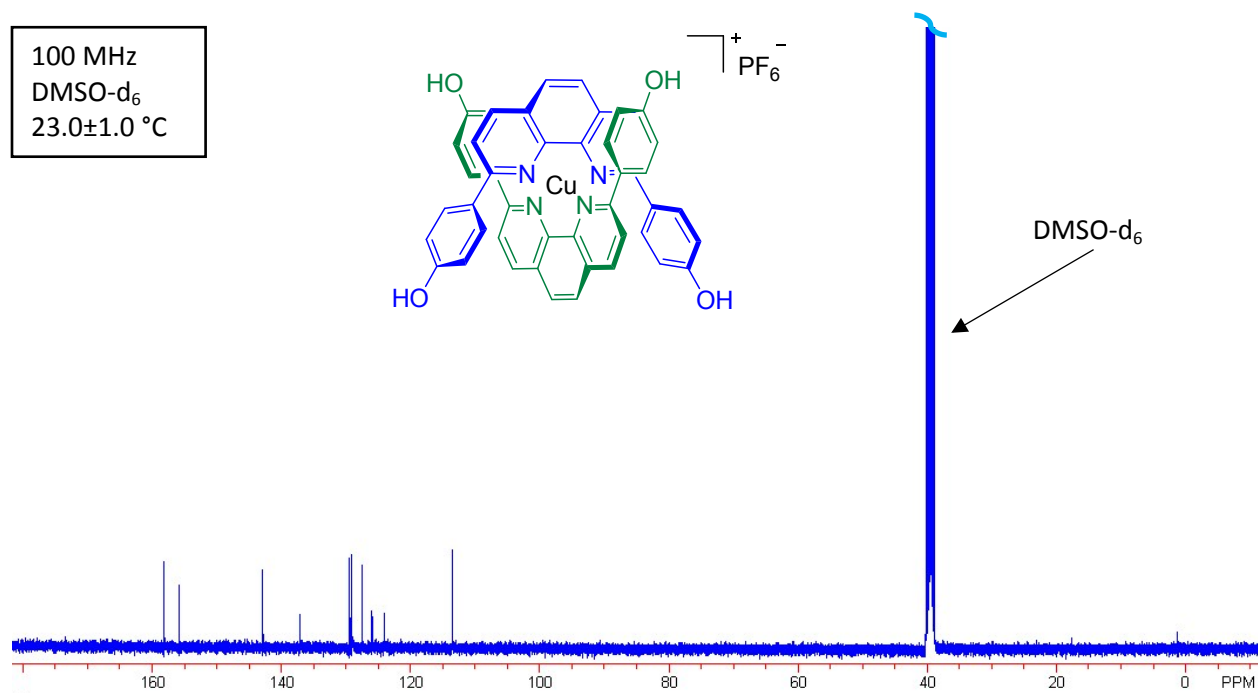

Fig. S5  $^1\text{H}$  NMR spectrum of  $[\text{Cu} \cdot (\mathbf{3})_2]\text{PF}_6$

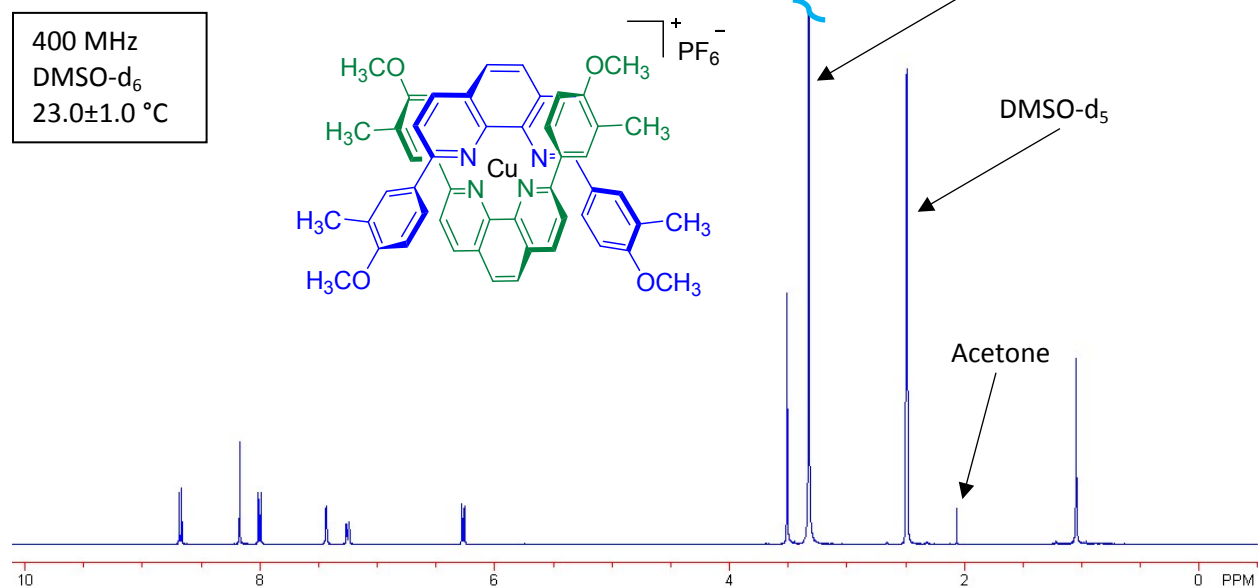

Fig. S6  $^{13}\text{C}$  NMR spectrum of  $[\text{Cu} \cdot (\mathbf{3})_2]\text{PF}_6$

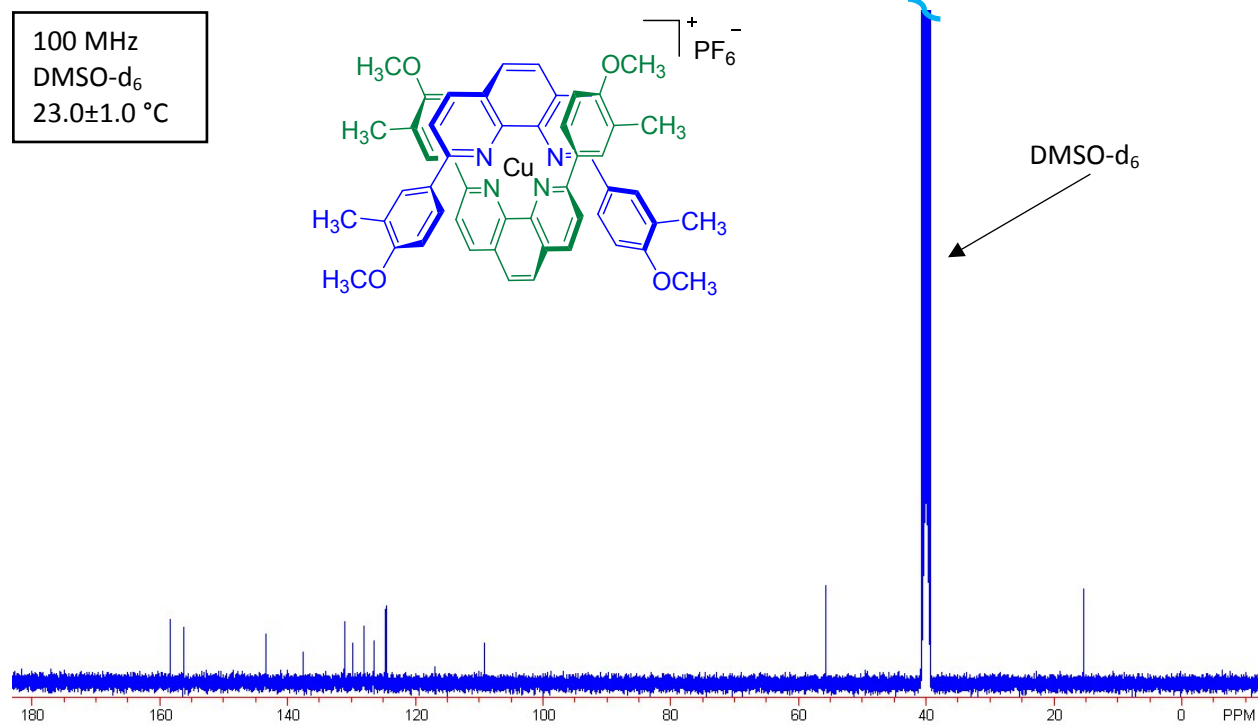

Fig. S7  $^1\text{H}$  NMR spectrum of  $[\text{Cu} \cdot (\mathbf{4})_2]\text{PF}_6$

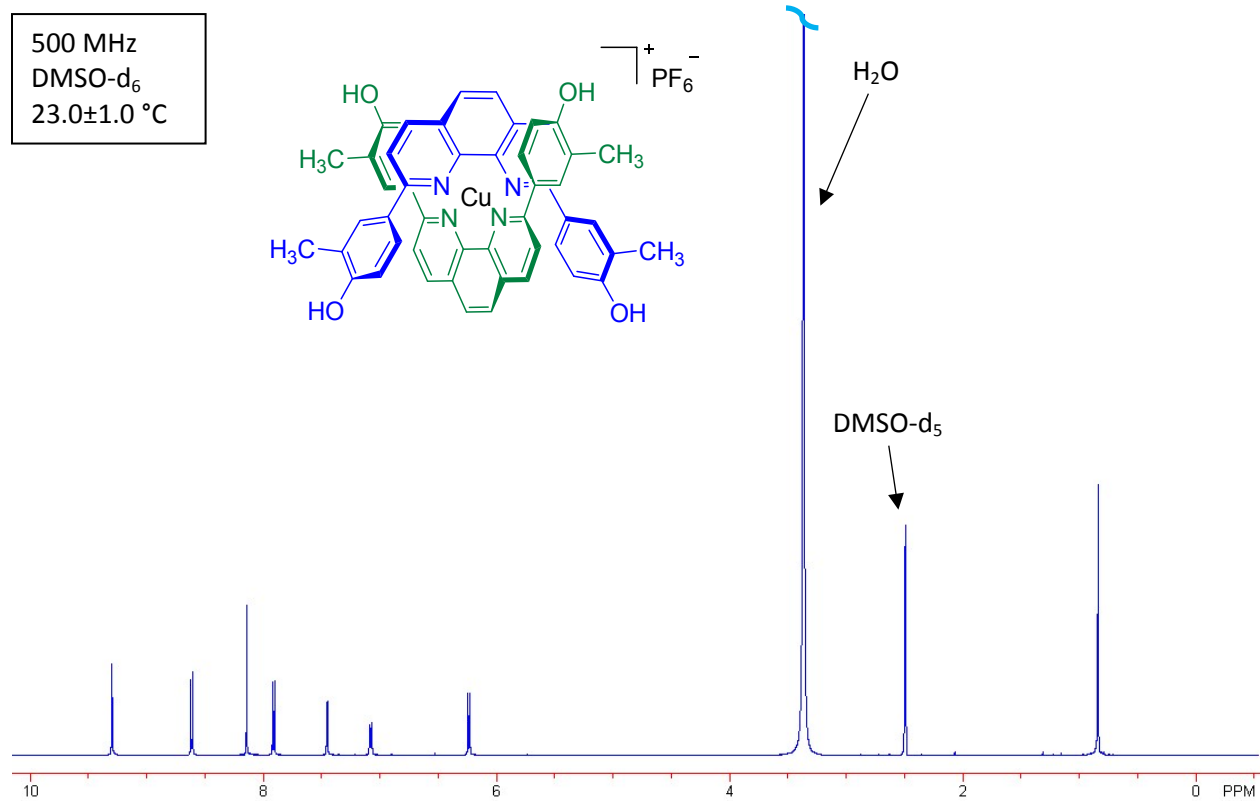

Fig. S8  $^{13}\text{C}$  NMR spectrum of  $[\text{Cu} \cdot (\mathbf{4})_2]\text{PF}_6$

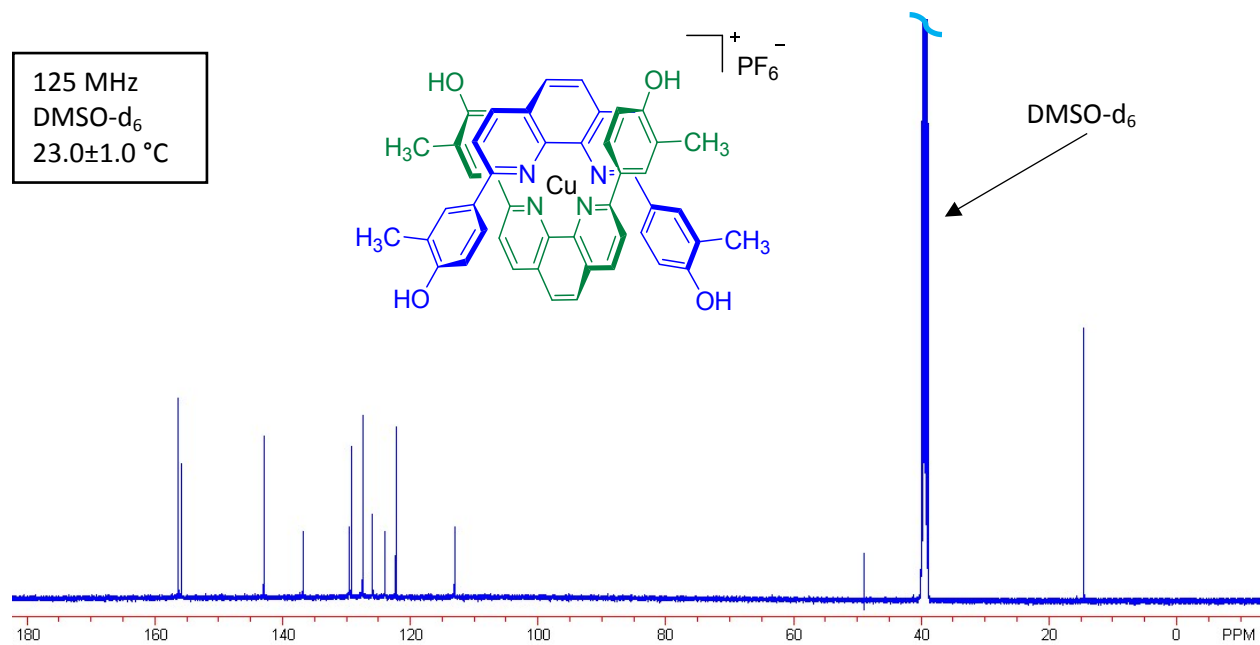

Fig. S9 Assigned protons on the ligands and respective complexes.

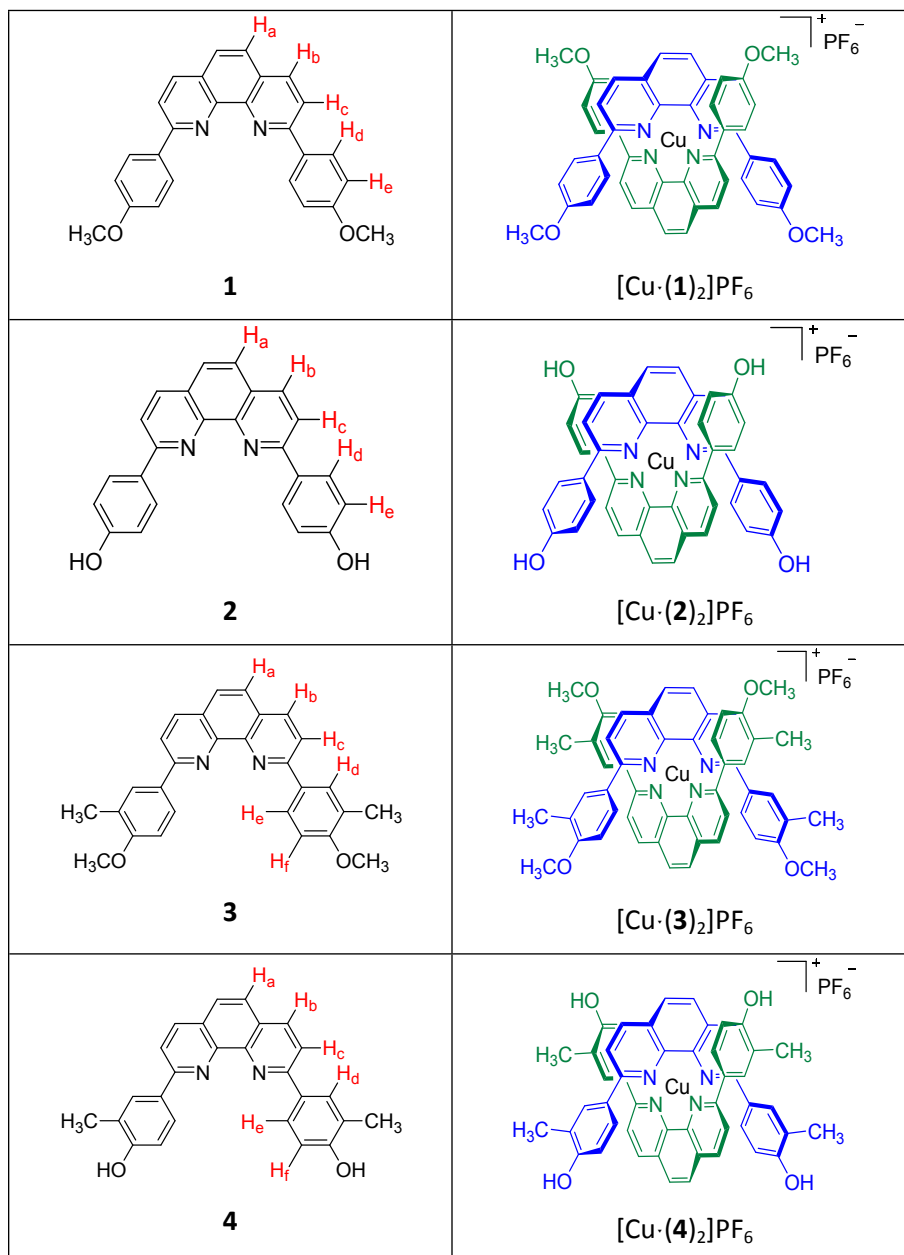



Table S1 Chemical shifts and  $\Delta\delta$  of **1** and  $[\text{Cu}\cdot(\mathbf{1})_2]\text{PF}_6$ .

| Protons                                                                          | H <sub>a</sub> | H <sub>b</sub> | H <sub>c</sub> | H <sub>d</sub> | H <sub>e</sub> | OCH <sub>3</sub> |
|----------------------------------------------------------------------------------|----------------|----------------|----------------|----------------|----------------|------------------|
| $\delta$ of <b>1</b> (ppm)                                                       | 7.93           | 8.50           | 8.33           | 8.48           | 7.18           | 3.88             |
| $\delta$ of $[\text{Cu}\cdot(\mathbf{1})_2]\text{PF}_6$ (ppm)                    | 8.17           | 8.69           | 8.01           | 7.44           | 6.05           | 3.38             |
| $\Delta\delta$ of $[\text{Cu}\cdot(\mathbf{1})_2]\text{PF}_6$ and <b>1</b> (ppm) | 0.24           | 0.19           | -0.32          | -1.04          | -1.13          | -0.50            |

Table S2 Chemical shifts and  $\Delta\delta$  of **2** and  $[\text{Cu}\cdot(\mathbf{2})_2]\text{PF}_6$ .

| Protons                                                                          | H <sub>a</sub> | H <sub>b</sub> | H <sub>c</sub> | H <sub>d</sub> | H <sub>e</sub> | OH    |
|----------------------------------------------------------------------------------|----------------|----------------|----------------|----------------|----------------|-------|
| $\delta$ of <b>2</b> (ppm)                                                       | 7.89           | 8.45           | 8.26           | 8.36           | 6.99           | 9.87  |
| $\delta$ of $[\text{Cu}\cdot(\mathbf{2})_2]\text{PF}_6$ (ppm)                    | 8.14           | 8.65           | 7.95           | 7.34           | 5.88           | 9.33  |
| $\Delta\delta$ of $[\text{Cu}\cdot(\mathbf{2})_2]\text{PF}_6$ and <b>2</b> (ppm) | 0.25           | 0.20           | -0.31          | -1.02          | -1.11          | -0.54 |

Table S3 Chemical shifts and  $\Delta\delta$  of **3** and  $[\text{Cu}\cdot(\mathbf{3})_2]\text{PF}_6$ .

| Protons                                                                          | H <sub>a</sub> | H <sub>b</sub> | H <sub>c</sub> | H <sub>d</sub> | H <sub>e</sub> | H <sub>f</sub> | OCH <sub>3</sub> | CH <sub>3</sub> |
|----------------------------------------------------------------------------------|----------------|----------------|----------------|----------------|----------------|----------------|------------------|-----------------|
| $\delta$ of <b>3</b> (ppm)                                                       | 7.91           | 8.49           | 8.33           | 8.46           | 8.34           | 7.15           | 3.91             | 2.35            |
| $\delta$ of $[\text{Cu}\cdot(\mathbf{3})_2]\text{PF}_6$ (ppm)                    | 8.17           | 8.67           | 8.00           | 7.43           | 7.25           | 6.27           | 3.51             | 1.05            |
| $\Delta\delta$ of $[\text{Cu}\cdot(\mathbf{3})_2]\text{PF}_6$ and <b>3</b> (ppm) | 0.26           | 0.18           | -0.33          | -1.03          | -1.09          | -0.88          | -0.40            | -1.30           |

Table S4 Chemical shifts and  $\Delta\delta$  of **4** and  $[\text{Cu}\cdot(\mathbf{4})_2]\text{PF}_6$ .

| Protons                                                                          | H <sub>a</sub> | H <sub>b</sub> | H <sub>c</sub> | H <sub>d</sub> | H <sub>e</sub> | H <sub>f</sub> | OH    | CH <sub>3</sub> |
|----------------------------------------------------------------------------------|----------------|----------------|----------------|----------------|----------------|----------------|-------|-----------------|
| $\delta$ of <b>4</b> (ppm)                                                       | 7.87           | 8.45           | 8.26           | 8.43           | 8.15           | 6.98           | 9.78  | 2.31            |
| $\delta$ of $[\text{Cu}\cdot(\mathbf{4})_2]\text{PF}_6$ (ppm)                    | 8.14           | 8.61           | 7.91           | 7.45           | 7.08           | 6.23           | 9.30  | 0.84            |
| $\Delta\delta$ of $[\text{Cu}\cdot(\mathbf{4})_2]\text{PF}_6$ and <b>4</b> (ppm) | 0.27           | 0.16           | -0.35          | -0.98          | -1.07          | -0.75          | -0.48 | -1.47           |

**Notes:**

- 1-  $\Delta\delta$  values have been calculated with  $(\delta_{\text{complex}} - \delta_{\text{ligand}})$ .
- 2- Negative  $\Delta\delta$  values indicate upfield shifts.
- 3- Positive  $\Delta\delta$  values indicate downfield shifts.

### DFT Optimized Coordinates

Table S5 DFT optimized coordinates of **1**.

| Atom | x        | y        | z        |
|------|----------|----------|----------|
| O    | -3.53773 | -4.06614 | 2.647037 |
| O    | 1.320967 | 4.762322 | 4.127254 |
| N    | -0.15681 | -0.94766 | -1.72573 |
| N    | 1.133494 | 1.459898 | -1.31926 |
| C    | -0.79766 | -2.10671 | -1.90372 |
| C    | -0.80636 | -2.76208 | -3.16529 |
| C    | -0.11806 | -2.20524 | -4.21874 |
| C    | 0.575911 | -0.98653 | -4.04686 |
| C    | 1.306012 | -0.36112 | -5.10306 |
| C    | 1.957582 | 0.822245 | -4.89724 |
| C    | 1.921698 | 1.464644 | -3.62222 |
| C    | 2.587747 | 2.683808 | -3.36447 |
| C    | 2.519547 | 3.25714  | -2.11544 |
| C    | 1.760845 | 2.618921 | -1.09633 |
| C    | 1.201434 | 0.882731 | -2.53388 |
| C    | 0.511991 | -0.38661 | -2.75141 |
| C    | -1.51424 | -2.65674 | -0.73137 |
| C    | -1.79888 | -1.82285 | 0.365884 |
| C    | -2.47482 | -2.30987 | 1.47427  |
| C    | -2.87668 | -3.64909 | 1.519974 |
| C    | -2.59981 | -4.51835 | 0.446728 |
| C    | -1.92489 | -3.99774 | -0.65968 |
| C    | 1.644397 | 3.187123 | 0.265334 |
| C    | 1.976633 | 4.521949 | 0.560771 |
| C    | 1.869806 | 5.061215 | 1.842495 |
| C    | 1.413489 | 4.216019 | 2.871384 |
| C    | 1.071553 | 2.885663 | 2.604222 |
| C    | 1.181708 | 2.377902 | 1.316314 |
| H    | -1.36725 | -3.68449 | -3.30879 |
| H    | -0.11355 | -2.68956 | -5.19751 |
| H    | 1.333245 | -0.84774 | -6.08015 |
| H    | 2.517368 | 1.296109 | -5.70624 |
| H    | 3.166366 | 3.15592  | -4.16131 |
| H    | 3.058574 | 4.181023 | -1.9115  |
| H    | -1.47521 | -0.78399 | 0.323335 |
| H    | -2.70676 | -1.66543 | 2.322215 |
| C    | -3.01523 | -5.96454 | 0.509805 |
| H    | -1.69147 | -4.68325 | -1.47612 |
| H    | 2.309797 | 5.189173 | -0.23567 |

|   |          |          |          |
|---|----------|----------|----------|
| C | 2.216539 | 6.491993 | 2.141236 |
| H | 0.717549 | 2.242522 | 3.41517  |
| H | 0.911971 | 1.345745 | 1.098043 |
| H | -2.54972 | -6.49684 | 1.355654 |
| H | -2.7183  | -6.4962  | -0.40143 |
| H | -4.10739 | -6.08259 | 0.605098 |
| H | 3.019698 | 6.561781 | 2.88864  |
| H | 1.35672  | 7.033958 | 2.55981  |
| H | 2.544153 | 7.013511 | 1.233962 |
| H | 0.987545 | 4.084191 | 4.743809 |
| H | -3.77161 | -5.00846 | 2.554135 |

Table S6 DFT optimized coordinates of **2**.

| Atom | x        | y        | z        |
|------|----------|----------|----------|
| O    | -3.60897 | -3.865   | 2.740447 |
| O    | 1.704884 | 4.701373 | 4.136194 |
| N    | -0.25663 | -0.84679 | -1.73092 |
| N    | 1.155947 | 1.494849 | -1.34695 |
| C    | -0.95374 | -1.97429 | -1.89803 |
| C    | -1.04001 | -2.6124  | -3.16527 |
| C    | -0.36909 | -2.07195 | -4.23825 |
| C    | 0.383543 | -0.88682 | -4.07931 |
| C    | 1.098255 | -0.27938 | -5.15636 |
| C    | 1.808129 | 0.871966 | -4.96287 |
| C    | 1.850534 | 1.497906 | -3.67986 |
| C    | 2.579371 | 2.683297 | -3.43494 |
| C    | 2.586607 | 3.241655 | -2.17729 |
| C    | 1.842084 | 2.622173 | -1.13661 |
| C    | 1.149566 | 0.932394 | -2.57052 |
| C    | 0.396264 | -0.30185 | -2.77565 |
| C    | -1.65013 | -2.50889 | -0.70653 |
| C    | -1.86313 | -1.67633 | 0.409846 |
| C    | -2.5163  | -2.13775 | 1.543014 |
| C    | -2.97168 | -3.46149 | 1.596987 |
| C    | -2.76055 | -4.31033 | 0.504169 |
| C    | -2.1105  | -3.83352 | -0.63141 |
| C    | 1.807261 | 3.17638  | 0.235123 |
| C    | 2.195627 | 4.495952 | 0.532284 |
| C    | 2.153747 | 4.991377 | 1.830037 |
| C    | 1.721232 | 4.167638 | 2.875067 |
| C    | 1.32434  | 2.851801 | 2.600465 |
| C    | 1.364566 | 2.369407 | 1.298387 |

|   |          |          |          |
|---|----------|----------|----------|
| H | -1.6458  | -3.5078  | -3.29711 |
| H | -0.42346 | -2.54301 | -5.22194 |
| H | 1.06594  | -0.7537  | -6.13932 |
| H | 2.355753 | 1.332134 | -5.78786 |
| H | 3.14574  | 3.140712 | -4.2489  |
| H | 3.173603 | 4.13816  | -1.98358 |
| H | -1.49901 | -0.65101 | 0.361369 |
| H | -2.68765 | -1.48636 | 2.399823 |
| H | -1.93875 | -4.52559 | -1.45593 |
| H | 2.514931 | 5.168328 | -0.26394 |
| H | 0.984319 | 2.202112 | 3.411774 |
| H | 1.051262 | 1.350326 | 1.07537  |
| H | 1.377907 | 4.029212 | 4.762872 |
| H | -3.87438 | -4.7989  | 2.647235 |
| H | -3.10019 | -5.34882 | 0.541441 |
| H | 2.446589 | 6.017264 | 2.051628 |

Table S7 DFT optimized coordinates of **3**.

| <b>Atom</b> | <b>x</b> | <b>y</b> | <b>z</b> |
|-------------|----------|----------|----------|
| O           | -3.7373  | -4.44665 | 2.403346 |
| O           | 1.403934 | 4.439914 | 4.14839  |
| N           | -0.14199 | -1.22437 | -1.77334 |
| N           | 1.198979 | 1.14859  | -1.31837 |
| C           | -0.80572 | -2.36699 | -1.97503 |
| C           | -0.80022 | -3.01288 | -3.24148 |
| C           | -0.07653 | -2.46374 | -4.27502 |
| C           | 0.639821 | -1.26202 | -4.07836 |
| C           | 1.404849 | -0.64473 | -5.11438 |
| C           | 2.07758  | 0.522395 | -4.88595 |
| C           | 2.030071 | 1.155101 | -3.60643 |
| C           | 2.717568 | 2.357142 | -3.32635 |
| C           | 2.63881  | 2.921531 | -2.07387 |
| C           | 1.848152 | 2.291371 | -1.0744  |
| C           | 1.276601 | 0.580086 | -2.53675 |
| C           | 0.561601 | -0.67086 | -2.77948 |
| C           | -1.56482 | -2.90887 | -0.82593 |
| C           | -1.85131 | -2.08258 | 0.269958 |
| C           | -2.57471 | -2.55988 | 1.359417 |
| C           | -3.02117 | -3.88743 | 1.378119 |
| C           | -2.73903 | -4.75228 | 0.297321 |
| C           | -2.02065 | -4.24035 | -0.77975 |
| C           | 1.72403  | 2.851041 | 0.290118 |

|   |          |          |          |
|---|----------|----------|----------|
| C | 2.064551 | 4.182718 | 0.596135 |
| C | 1.953592 | 4.711565 | 1.879128 |
| C | 1.484637 | 3.864523 | 2.907853 |
| C | 1.134549 | 2.537153 | 2.62923  |
| C | 1.250455 | 2.04251  | 1.333145 |
| C | -4.04837 | -3.62524 | 3.525829 |
| C | 0.929409 | 3.637299 | 5.226462 |
| H | -1.37685 | -3.92218 | -3.40389 |
| H | -0.06068 | -2.94097 | -5.25717 |
| H | 1.441428 | -1.12454 | -6.09454 |
| H | 2.663608 | 0.99049  | -5.6796  |
| H | 3.321271 | 2.822476 | -4.10846 |
| H | 3.194428 | 3.831177 | -1.85117 |
| H | -1.49531 | -1.05345 | 0.250941 |
| H | -2.78814 | -1.88778 | 2.188939 |
| C | -3.20532 | -6.17996 | 0.335525 |
| H | -1.7891  | -4.92393 | -1.59822 |
| H | 2.406586 | 4.852766 | -0.19425 |
| C | 2.309623 | 6.138939 | 2.184205 |
| H | 0.772573 | 1.878534 | 3.417088 |
| H | 0.974615 | 1.013313 | 1.107542 |
| H | -3.13817 | -3.26604 | 4.030604 |
| H | -4.66763 | -2.76168 | 3.237939 |
| H | -4.61425 | -4.26144 | 4.213201 |
| H | -0.09895 | 3.286269 | 5.048968 |
| H | 1.582745 | 2.769289 | 5.404642 |
| H | 0.942192 | 4.28489  | 6.108409 |
| H | -2.79627 | -6.71308 | 1.205442 |
| H | -2.89988 | -6.71516 | -0.57158 |
| H | -4.29938 | -6.24266 | 0.421862 |
| H | 3.108355 | 6.201026 | 2.936992 |
| H | 1.451852 | 6.687283 | 2.598682 |
| H | 2.647121 | 6.659227 | 1.279805 |

Table S8 DFT optimized coordinates of **4**.

| <b>Atom</b> | <b>x</b> | <b>y</b> | <b>z</b> |
|-------------|----------|----------|----------|
| O           | -3.53773 | -4.06614 | 2.647037 |
| O           | 1.320967 | 4.762322 | 4.127254 |
| N           | -0.15681 | -0.94766 | -1.72573 |
| N           | 1.133494 | 1.459898 | -1.31926 |
| C           | -0.79766 | -2.10671 | -1.90372 |
| C           | -0.80636 | -2.76208 | -3.16529 |

|   |          |          |          |
|---|----------|----------|----------|
| C | -0.11806 | -2.20524 | -4.21874 |
| C | 0.575911 | -0.98653 | -4.04686 |
| C | 1.306012 | -0.36112 | -5.10306 |
| C | 1.957582 | 0.822245 | -4.89724 |
| C | 1.921698 | 1.464644 | -3.62222 |
| C | 2.587747 | 2.683808 | -3.36447 |
| C | 2.519547 | 3.25714  | -2.11544 |
| C | 1.760845 | 2.618921 | -1.09633 |
| C | 1.201434 | 0.882731 | -2.53388 |
| C | 0.511991 | -0.38661 | -2.75141 |
| C | -1.51424 | -2.65674 | -0.73137 |
| C | -1.79888 | -1.82285 | 0.365884 |
| C | -2.47482 | -2.30987 | 1.47427  |
| C | -2.87668 | -3.64909 | 1.519974 |
| C | -2.59981 | -4.51835 | 0.446728 |
| C | -1.92489 | -3.99774 | -0.65968 |
| C | 1.644397 | 3.187123 | 0.265334 |
| C | 1.976633 | 4.521949 | 0.560771 |
| C | 1.869806 | 5.061215 | 1.842495 |
| C | 1.413489 | 4.216019 | 2.871384 |
| C | 1.071553 | 2.885663 | 2.604222 |
| C | 1.181708 | 2.377902 | 1.316314 |
| H | -1.36725 | -3.68449 | -3.30879 |
| H | -0.11355 | -2.68956 | -5.19751 |
| H | 1.333245 | -0.84774 | -6.08015 |
| H | 2.517368 | 1.296109 | -5.70624 |
| H | 3.166366 | 3.15592  | -4.16131 |
| H | 3.058574 | 4.181023 | -1.9115  |
| H | -1.47521 | -0.78399 | 0.323335 |
| H | -2.70676 | -1.66543 | 2.322215 |
| C | -3.01523 | -5.96454 | 0.509805 |
| H | -1.69147 | -4.68325 | -1.47612 |
| H | 2.309797 | 5.189173 | -0.23567 |
| C | 2.216539 | 6.491993 | 2.141236 |
| H | 0.717549 | 2.242522 | 3.41517  |
| H | 0.911971 | 1.345745 | 1.098043 |
| H | -2.54972 | -6.49684 | 1.355654 |
| H | -2.7183  | -6.4962  | -0.40143 |
| H | -4.10739 | -6.08259 | 0.605098 |
| H | 3.019698 | 6.561781 | 2.88864  |
| H | 1.35672  | 7.033958 | 2.55981  |
| H | 2.544153 | 7.013511 | 1.233962 |
| H | 0.987545 | 4.084191 | 4.743809 |

H -3.77161 -5.00846 2.554135

Table S9 DFT optimized coordinates of [Cu·(1)<sub>2</sub>]<sup>+</sup>.

| Atom | x        | y        | z        |
|------|----------|----------|----------|
| Cu   | -0.00073 | 0.186569 | -0.00018 |
| O    | -4.17528 | -4.18719 | 2.294942 |
| O    | 2.158483 | 4.708394 | 4.175678 |
| N    | -0.32842 | -0.91095 | -1.70215 |
| N    | 1.199457 | 1.301218 | -1.23482 |
| C    | -1.01074 | -2.06242 | -1.88411 |
| C    | -0.99408 | -2.72367 | -3.13875 |
| C    | -0.29787 | -2.19428 | -4.20038 |
| C    | 0.422276 | -0.99174 | -4.03176 |
| C    | 1.141545 | -0.36336 | -5.09356 |
| C    | 1.811168 | 0.809416 | -4.88665 |
| C    | 1.834361 | 1.419882 | -3.59569 |
| C    | 2.520378 | 2.624936 | -3.32929 |
| C    | 2.520815 | 3.138645 | -2.0533  |
| C    | 1.860603 | 2.455249 | -1.00073 |
| C    | 1.163878 | 0.801222 | -2.50604 |
| C    | 0.39213  | -0.39378 | -2.74278 |
| C    | -1.81124 | -2.62658 | -0.78196 |
| C    | -2.55672 | -1.81114 | 0.091265 |
| C    | -3.33317 | -2.35746 | 1.099013 |
| C    | -3.38636 | -3.75106 | 1.278347 |
| C    | -2.64701 | -4.58225 | 0.422513 |
| C    | -1.88226 | -4.01663 | -0.59589 |
| C    | 1.9253   | 3.001339 | 0.366618 |
| C    | 1.838145 | 4.392716 | 0.582005 |
| C    | 1.909328 | 4.928238 | 1.857126 |
| C    | 2.094942 | 4.087447 | 2.968791 |
| C    | 2.203816 | 2.701942 | 2.772573 |
| C    | 2.110557 | 2.177783 | 1.485209 |
| C    | -4.30632 | -5.59842 | 2.490918 |
| C    | 2.36358  | 3.903374 | 5.339769 |
| H    | -1.58522 | -3.62867 | -3.26492 |
| H    | -0.31099 | -2.68351 | -5.17532 |
| H    | 1.140837 | -0.83723 | -6.076   |
| H    | 2.349452 | 1.293748 | -5.70246 |
| H    | 3.057577 | 3.129785 | -4.1334  |
| H    | 3.073276 | 4.048353 | -1.82592 |
| H    | -2.54256 | -0.73015 | -0.03755 |

|   |          |          |          |
|---|----------|----------|----------|
| H | -3.92888 | -1.72496 | 1.756858 |
| H | -2.66135 | -5.66416 | 0.538269 |
| H | -1.29819 | -4.67863 | -1.23643 |
| H | 1.674913 | 5.062865 | -0.26263 |
| H | 1.825239 | 6.001774 | 2.023621 |
| H | 2.373545 | 2.027629 | 3.609624 |
| H | 2.206284 | 1.101305 | 1.349973 |
| H | -4.72915 | -6.08953 | 1.602163 |
| H | -3.34096 | -6.06177 | 2.744158 |
| H | -4.99519 | -5.71731 | 3.331315 |
| H | 1.542413 | 3.184292 | 5.48192  |
| H | 3.321244 | 3.364272 | 5.292394 |
| H | 2.383506 | 4.60091  | 6.181258 |
| N | 0.326834 | -0.91068 | 1.701991 |
| N | -1.20088 | 1.301515 | 1.234236 |
| C | 1.009474 | -2.06191 | 1.884262 |
| C | -0.39421 | -0.39366 | 2.742353 |
| C | -1.86159 | 2.455782 | 1.000066 |
| C | -1.16584 | 0.801379 | 2.505415 |
| C | 0.992546 | -2.72313 | 3.138913 |
| C | 1.81075  | -2.62572 | 0.7825   |
| C | -0.42467 | -0.9916  | 4.031343 |
| C | -2.52207 | 3.139175 | 2.052468 |
| C | -1.9254  | 3.002269 | -0.36717 |
| C | -1.8366  | 1.420062 | 3.594907 |
| C | 0.295718 | -2.19396 | 4.200245 |
| H | 1.583971 | -3.6279  | 3.265365 |
| C | 2.556571 | -1.80997 | -0.09014 |
| C | 1.882243 | -4.01573 | 0.596288 |
| C | -1.14442 | -0.36334 | 5.092886 |
| C | -2.52227 | 2.625286 | 3.32839  |
| H | -3.07414 | 4.0491   | 1.825022 |
| C | -1.83814 | 4.393715 | -0.58207 |
| C | -2.10973 | 2.179048 | -1.48616 |
| C | -1.81389 | 0.8095   | 4.885826 |
| H | 0.308639 | -2.68315 | 5.175218 |
| C | 3.333767 | -2.35595 | -1.09749 |
| H | 2.542107 | -0.72899 | 0.038869 |
| C | 2.64775  | -4.581   | -0.42174 |
| H | 1.297956 | -4.67798 | 1.236373 |
| H | -1.144   | -0.83721 | 6.075315 |
| H | -3.05961 | 3.130188 | 4.13237  |
| C | -1.90848 | 4.929629 | -1.85707 |



|   |          |          |          |
|---|----------|----------|----------|
| H | -1.67555 | 5.063612 | 0.262891 |
| C | -2.20211 | 2.703595 | -2.77343 |
| H | -2.2054  | 1.102524 | -1.35134 |
| H | -2.35239 | 1.293831 | 5.701497 |
| C | 3.387393 | -3.74951 | -1.27702 |
| H | 3.929733 | -1.7232  | -1.75487 |
| H | 2.662442 | -5.66289 | -0.53763 |
| C | -2.09323 | 4.089177 | -2.96914 |
| H | -1.82436 | 6.003223 | -2.02317 |
| H | -2.37115 | 2.029521 | -3.61081 |
| O | 4.177034 | -4.1853  | -2.2932  |
| O | -2.15596 | 4.710494 | -4.17588 |
| C | 4.308499 | -5.59646 | -2.48933 |
| C | -2.36005 | 3.905815 | -5.34038 |
| H | 4.730905 | -6.08762 | -1.6004  |
| H | 3.343389 | -6.05998 | -2.74321 |
| H | 4.997894 | -5.71507 | -3.32934 |
| H | -1.53868 | 3.18689  | -5.48213 |
| H | -3.31768 | 3.36657  | -5.29391 |
| H | -2.37942 | 4.603614 | -6.18166 |

Table S10 DFT optimized coordinates of  $[\text{Cu} \cdot (\mathbf{2})_2]^+$ .

| Atom | x        | y        | z        |
|------|----------|----------|----------|
| Cu   | 0.004318 | 0.321841 | 0.006109 |
| O    | -4.13422 | -4.03846 | 2.39132  |
| O    | 2.167126 | 4.918409 | 4.09884  |
| N    | -0.33601 | -0.79505 | -1.67944 |
| N    | 1.185734 | 1.430597 | -1.25466 |
| C    | -1.01263 | -1.95334 | -1.83913 |
| C    | -0.99316 | -2.63933 | -3.08002 |
| C    | -0.3015  | -2.1266  | -4.15272 |
| C    | 0.411417 | -0.91656 | -4.0082  |
| C    | 1.124597 | -0.30393 | -5.08343 |
| C    | 1.787866 | 0.876451 | -4.89993 |
| C    | 1.811037 | 1.510665 | -3.62029 |
| C    | 2.492113 | 2.723631 | -3.37813 |
| C    | 2.495812 | 3.259184 | -2.11117 |
| C    | 1.842254 | 2.591819 | -1.04406 |
| C    | 1.14711  | 0.908508 | -2.51727 |
| C    | 0.380241 | -0.2941  | -2.73079 |
| C    | -1.80887 | -2.49961 | -0.72486 |
| C    | -2.55843 | -1.67076 | 0.129396 |

|   |          |          |          |
|---|----------|----------|----------|
| C | -3.32981 | -2.19679 | 1.155189 |
| C | -3.36559 | -3.58268 | 1.363272 |
| C | -2.62506 | -4.42754 | 0.524529 |
| C | -1.86792 | -3.88824 | -0.50983 |
| C | 1.909782 | 3.164361 | 0.312744 |
| C | 1.829303 | 4.5589   | 0.499343 |
| C | 1.906191 | 5.125451 | 1.763251 |
| C | 2.090413 | 4.30527  | 2.885184 |
| C | 2.188119 | 2.916554 | 2.719059 |
| C | 2.090871 | 2.360057 | 1.448654 |
| H | -1.57746 | -3.55103 | -3.18801 |
| H | -0.31258 | -2.63548 | -5.1175  |
| H | 1.12154  | -0.79432 | -6.05775 |
| H | 2.317953 | 1.350808 | -5.7269  |
| H | 3.022821 | 3.217548 | -4.19325 |
| H | 3.04546  | 4.174982 | -1.90258 |
| H | -2.55367 | -0.59337 | -0.02723 |
| H | -3.92872 | -1.55218 | 1.797814 |
| H | -1.28231 | -4.5609  | -1.13723 |
| H | 1.667272 | 5.211413 | -0.35899 |
| H | 2.352545 | 2.270615 | 3.584888 |
| H | 2.175282 | 1.279973 | 1.337301 |
| N | 0.349394 | -0.77867 | 1.697995 |
| N | -1.18862 | 1.431108 | 1.258163 |
| C | 1.032339 | -1.93173 | 1.863072 |
| C | -0.37425 | -0.27937 | 2.744984 |
| C | -1.85575 | 2.584343 | 1.039563 |
| C | -1.15001 | 0.915564 | 2.523375 |
| C | 1.011972 | -2.61558 | 3.104766 |
| C | 1.83381  | -2.47646 | 0.751332 |
| C | -0.40642 | -0.89845 | 4.023773 |
| C | -2.51906 | 3.251011 | 2.100848 |
| C | -1.92475 | 3.148036 | -0.32113 |
| C | -1.82433 | 1.515764 | 3.620802 |
| C | 0.313433 | -2.10362 | 4.173887 |
| H | 1.600679 | -3.52428 | 3.215659 |
| C | 2.602933 | -1.64936 | -0.08201 |
| C | 1.876092 | -3.86564 | 0.5204   |
| C | -1.13028 | -0.28843 | 5.093278 |
| C | -2.51564 | 2.721151 | 3.370316 |
| H | -3.07677 | 4.160397 | 1.885531 |
| C | -1.84734 | 4.541194 | -0.51677 |
| C | -2.10583 | 2.335429 | -1.4511  |

|   |          |          |          |
|---|----------|----------|----------|
| C | -1.80185 | 0.88585  | 4.902603 |
| H | 0.323183 | -2.61    | 5.139998 |
| C | 3.381723 | -2.17933 | -1.10475 |
| H | 2.610082 | -0.57321 | 0.083279 |
| C | 2.634581 | -4.40591 | -0.50823 |
| H | 1.275963 | -4.53448 | 1.138271 |
| H | -1.13158 | -0.77739 | 6.068182 |
| H | -3.05554 | 3.212937 | 4.180614 |
| C | -1.92648 | 5.099315 | -1.78454 |
| H | -1.68708 | 5.199448 | 0.337559 |
| C | -2.20547 | 2.883384 | -2.72509 |
| H | -2.19072 | 1.256224 | -1.33181 |
| H | -2.34294 | 1.356429 | 5.724465 |
| C | 3.397781 | -3.56337 | -1.32825 |
| H | 3.990304 | -1.51608 | -1.72447 |
| C | -2.11039 | 4.271194 | -2.90048 |
| H | -2.37081 | 2.231758 | -3.58651 |
| O | 4.129447 | -4.15124 | -2.31559 |
| O | -2.18982 | 4.875935 | -4.11857 |
| H | -2.35487 | 4.208891 | -4.81141 |
| H | 2.328019 | 4.256508 | 4.797575 |
| H | -4.11958 | -5.01402 | 2.412233 |
| H | 4.646147 | -3.476   | -2.79449 |
| H | -2.64199 | -5.50885 | 0.679626 |
| H | 2.65427  | -5.47952 | -0.69172 |
| H | 1.82902  | 6.202877 | 1.90455  |
| H | -1.85255 | 6.176    | -1.93302 |

Table S11 DFT optimized coordinates of  $[\text{Cu} \cdot (\mathbf{3})_2]^+$ .

| Atom | x        | y        | z        |
|------|----------|----------|----------|
| Cu   | 0.000673 | -0.04003 | -0.00172 |
| O    | -4.19863 | -4.5652  | 2.09801  |
| O    | 1.957363 | 4.562123 | 4.197802 |
| N    | -0.2482  | -1.15135 | -1.70787 |
| N    | 1.248749 | 1.068488 | -1.19477 |
| C    | -0.91442 | -2.30979 | -1.90366 |
| C    | -0.8254  | -2.99627 | -3.14162 |
| C    | -0.08042 | -2.47999 | -4.17642 |
| C    | 0.621224 | -1.26821 | -3.99348 |
| C    | 1.389199 | -0.65113 | -5.02759 |
| C    | 2.040382 | 0.529874 | -4.80575 |
| C    | 1.99676  | 1.15973  | -3.5245  |

|   |          |          |          |
|---|----------|----------|----------|
| C | 2.662465 | 2.372519 | -3.24154 |
| C | 2.598423 | 2.902504 | -1.97377 |
| C | 1.892847 | 2.228904 | -0.94404 |
| C | 1.276788 | 0.552827 | -2.46005 |
| C | 0.522157 | -0.64862 | -2.71824 |
| C | -1.77018 | -2.85431 | -0.83463 |
| C | -2.57785 | -2.02922 | -0.04328 |
| C | -3.40794 | -2.56533 | 0.938043 |
| C | -3.43071 | -3.94915 | 1.157334 |
| C | -2.62461 | -4.81286 | 0.376744 |
| C | -1.82383 | -4.24479 | -0.6077  |
| C | 1.892951 | 2.791844 | 0.417946 |
| C | 1.792084 | 4.18527  | 0.607103 |
| C | 1.80298  | 4.773393 | 1.866739 |
| C | 1.945533 | 3.927294 | 2.99319  |
| C | 2.065212 | 2.540791 | 2.829358 |
| C | 2.029652 | 1.984265 | 1.553073 |
| C | -5.05856 | -3.759   | 2.906997 |
| C | 2.117935 | 3.773401 | 5.379245 |
| H | -1.40007 | -3.91033 | -3.27834 |
| H | -0.03998 | -2.98727 | -5.14139 |
| H | 1.437442 | -1.13774 | -6.00273 |
| H | 2.612608 | 1.007327 | -5.60247 |
| H | 3.235213 | 2.87022  | -4.02545 |
| H | 3.134914 | 3.818002 | -1.73185 |
| H | -2.57964 | -0.95261 | -0.20663 |
| H | -4.04123 | -1.89813 | 1.519765 |
| C | -2.65033 | -6.29307 | 0.626405 |
| H | -1.18731 | -4.90786 | -1.1968  |
| H | 1.661729 | 4.834471 | -0.26068 |
| C | 1.667033 | 6.256702 | 2.054305 |
| H | 2.197265 | 1.887246 | 3.689469 |
| H | 2.133875 | 0.905733 | 1.443997 |
| H | -4.48554 | -3.0372  | 3.5086   |
| H | -5.79885 | -3.2221  | 2.295495 |
| H | -5.57663 | -4.45489 | 3.572424 |
| H | 1.293712 | 3.05377  | 5.498117 |
| H | 3.077655 | 3.235879 | 5.376629 |
| H | 2.103258 | 4.481698 | 6.212038 |
| N | 0.249819 | -1.15431 | 1.702506 |
| N | -1.24704 | 1.066599 | 1.193267 |
| C | 0.916081 | -2.31304 | 1.896366 |
| C | -0.52016 | -0.65299 | 2.713883 |

|   |          |          |          |
|---|----------|----------|----------|
| C | -1.89129 | 2.227354 | 0.944559 |
| C | -1.27484 | 0.548847 | 2.457736 |
| C | 0.827544 | -3.00131 | 3.133349 |
| C | 1.771285 | -2.85599 | 0.826091 |
| C | -0.61874 | -1.27444 | 3.988263 |
| C | -2.59693 | 2.899142 | 1.975439 |
| C | -1.89136 | 2.79272  | -0.41646 |
| C | -1.99462 | 1.154035 | 3.523282 |
| C | 0.082988 | -2.48648 | 4.169177 |
| H | 1.402185 | -3.91561 | 3.268519 |
| C | 2.57883  | -2.02978 | 0.035838 |
| C | 1.824417 | -4.24609 | 0.596693 |
| C | -1.38639 | -0.65894 | 5.023551 |
| C | -2.66064 | 2.367131 | 3.242364 |
| H | -3.13361 | 3.81491  | 1.734981 |
| C | -1.79052 | 4.186483 | -0.60309 |
| C | -2.02797 | 1.987148 | -1.55302 |
| C | -2.03779 | 0.522301 | 4.803635 |
| H | 0.042929 | -2.99511 | 5.133449 |
| C | 3.408107 | -2.5644  | -0.94701 |
| H | 2.581105 | -0.95346 | 0.201051 |
| C | 2.624342 | -4.81263 | -0.38933 |
| H | 1.188199 | -4.91    | 1.185161 |
| H | -1.43423 | -1.14699 | 5.997987 |
| H | -3.23333 | 2.863451 | 4.027198 |
| C | -1.80133 | 4.776857 | -1.86168 |
| H | -1.66023 | 4.834091 | 0.265887 |
| C | -2.06345 | 2.545968 | -2.82831 |
| H | -2.13218 | 0.908429 | -1.44589 |
| H | -2.60985 | 0.998528 | 5.601203 |
| C | 3.430169 | -3.94782 | -1.16896 |
| H | 4.041366 | -1.89626 | -1.52769 |
| C | 2.649275 | -6.29239 | -0.64178 |
| C | -1.94377 | 3.932758 | -2.98964 |
| C | -1.66542 | 6.260498 | -2.0466  |
| H | -2.19542 | 1.893982 | -3.68961 |
| O | 4.197056 | -4.56237 | -2.11153 |
| O | -1.9555  | 4.569748 | -4.19312 |
| C | 5.057151 | -3.75481 | -2.91907 |
| C | -2.11595 | 3.783146 | -5.37599 |
| H | 4.484631 | -3.03104 | -3.51877 |
| H | 5.797931 | -3.22003 | -2.30631 |
| H | 5.574396 | -4.44941 | -3.58648 |

|   |          |          |          |
|---|----------|----------|----------|
| H | -1.29168 | 3.063767 | -5.4961  |
| H | -3.07564 | 3.245574 | -5.37443 |
| H | -2.10124 | 4.492943 | -6.20751 |
| H | -2.35778 | -6.53089 | 1.658832 |
| H | -1.97276 | -6.81892 | -0.05647 |
| H | -3.66122 | -6.7024  | 0.493163 |
| H | -2.54271 | 6.680557 | -2.55775 |
| H | -0.79808 | 6.509095 | -2.6743  |
| H | -1.55297 | 6.768438 | -1.08157 |
| H | 2.544358 | 6.675902 | 2.566098 |
| H | 0.799737 | 6.504149 | 2.682525 |
| H | 1.554436 | 6.766337 | 1.090181 |
| H | 2.352613 | -6.52832 | -1.67349 |
| H | 1.974058 | -6.81936 | 0.042593 |
| H | 3.660576 | -6.70203 | -0.51306 |

Table S12 DFT optimized coordinates of [Cu·(4)<sub>2</sub>]<sup>+</sup>.

| Atom | x        | y        | z        |
|------|----------|----------|----------|
| Cu   | 0.006346 | 0.253236 | 0.006003 |
| O    | -4.20565 | -4.11821 | 2.228924 |
| O    | 1.994735 | 4.859332 | 4.164417 |
| N    | -0.27263 | -0.86741 | -1.69342 |
| N    | 1.231068 | 1.357171 | -1.20975 |
| C    | -0.94427 | -2.02473 | -1.87878 |
| C    | -0.8806  | -2.70826 | -3.11996 |
| C    | -0.15033 | -2.19423 | -4.16612 |
| C    | 0.55824  | -0.98517 | -3.99381 |
| C    | 1.309867 | -0.37061 | -5.04125 |
| C    | 1.966012 | 0.809546 | -4.83164 |
| C    | 1.942663 | 1.441575 | -3.55097 |
| C    | 2.613244 | 2.654776 | -3.28207 |
| C    | 2.568848 | 3.188714 | -2.01516 |
| C    | 1.87743  | 2.519396 | -0.97335 |
| C    | 1.239754 | 0.83704  | -2.47376 |
| C    | 0.481185 | -0.36524 | -2.71705 |
| C    | -1.78057 | -2.57049 | -0.79445 |
| C    | -2.55601 | -1.74068 | 0.032494 |
| C    | -3.3607  | -2.2777  | 1.026126 |
| C    | -3.40208 | -3.66259 | 1.224875 |
| C    | -2.63627 | -4.52904 | 0.416152 |
| C    | -1.84917 | -3.95951 | -0.58476 |
| C    | 1.892226 | 3.091209 | 0.385368 |

|   |          |          |          |
|---|----------|----------|----------|
| C | 1.790309 | 4.484592 | 0.564965 |
| C | 1.812579 | 5.085484 | 1.820954 |
| C | 1.967334 | 4.246285 | 2.944505 |
| C | 2.086861 | 2.860243 | 2.791685 |
| C | 2.041209 | 2.288737 | 1.525221 |
| H | -1.46305 | -3.6182  | -3.25062 |
| H | -0.12813 | -2.70045 | -5.13218 |
| H | 1.341849 | -0.85886 | -6.01616 |
| H | 2.525446 | 1.285565 | -5.63813 |
| H | 3.173644 | 3.150022 | -4.07631 |
| H | 3.109073 | 4.104864 | -1.78448 |
| H | -2.54468 | -0.66261 | -0.11828 |
| H | -3.98311 | -1.64104 | 1.654414 |
| C | -2.67287 | -6.01636 | 0.644073 |
| H | -1.23685 | -4.62439 | -1.19698 |
| H | 1.650727 | 5.126504 | -0.30667 |
| C | 1.677858 | 6.569352 | 2.003402 |
| H | 2.226177 | 2.225855 | 3.670717 |
| H | 2.143381 | 1.209555 | 1.423442 |
| N | 0.2898   | -0.85346 | 1.709671 |
| N | -1.2304  | 1.355812 | 1.214522 |
| C | 0.967862 | -2.00556 | 1.898862 |
| C | -0.47051 | -0.35429 | 2.729947 |
| C | -1.88774 | 2.510021 | 0.971673 |
| C | -1.23836 | 0.840309 | 2.480308 |
| C | 0.905193 | -2.68808 | 3.140181 |
| C | 1.807394 | -2.54935 | 0.815178 |
| C | -0.54732 | -0.97242 | 4.007345 |
| C | -2.58902 | 3.176542 | 2.008504 |
| C | -1.90393 | 3.075437 | -0.38993 |
| C | -1.95133 | 1.440902 | 3.55273  |
| C | 0.168855 | -2.1763  | 4.183709 |
| H | 1.491988 | -3.59519 | 3.272113 |
| C | 2.599585 | -1.72111 | 0.007931 |
| C | 1.858335 | -3.93855 | 0.588951 |
| C | -1.3092  | -0.36231 | 5.049924 |
| C | -2.63292 | 2.646375 | 3.277114 |
| H | -3.1379  | 4.086138 | 1.772274 |
| C | -1.80415 | 4.467939 | -0.57592 |
| C | -2.05304 | 2.267268 | -1.52563 |
| C | -1.97437 | 0.811493 | 4.83472  |
| H | 0.146032 | -2.68124 | 5.150409 |
| C | 3.407736 | -2.2633  | -0.98491 |

|   |          |          |          |
|---|----------|----------|----------|
| H | 2.602063 | -0.64434 | 0.168037 |
| C | 2.642387 | -4.51071 | -0.40994 |
| H | 1.23491  | -4.60084 | 1.192749 |
| H | -1.3448  | -0.85054 | 6.024578 |
| H | -3.20241 | 3.137837 | 4.06716  |
| C | -1.82788 | 5.063004 | -1.83478 |
| H | -1.6662  | 5.113779 | 0.293108 |
| C | -2.10034 | 2.833015 | -2.7948  |
| H | -2.15661 | 1.188673 | -1.41877 |
| H | -2.54462 | 1.282184 | 5.636629 |
| C | 3.427421 | -3.6459  | -1.20096 |
| H | 4.037664 | -1.60784 | -1.59194 |
| C | 2.670921 | -5.9908  | -0.6594  |
| C | -1.98243 | 4.218425 | -2.95414 |
| C | -1.69599 | 6.546322 | -2.02402 |
| H | -2.2407  | 2.194199 | -3.67049 |
| O | 4.193665 | -4.23132 | -2.16831 |
| O | -2.01155 | 4.825709 | -4.1773  |
| H | -2.33577 | -6.29106 | 1.656611 |
| H | -2.01939 | -6.53848 | -0.06378 |
| H | -3.68369 | -6.4338  | 0.508113 |
| H | -2.57921 | 6.962963 | -2.5277  |
| H | -0.83509 | 6.794629 | -2.66067 |
| H | -1.57524 | 7.057475 | -1.06178 |
| H | 2.561802 | 6.990676 | 2.501955 |
| H | 0.818634 | 6.818575 | 2.641862 |
| H | 1.552661 | 7.07562  | 1.039147 |
| H | 2.358355 | -6.23063 | -1.68552 |
| H | 2.011279 | -6.52083 | 0.037716 |
| H | 3.686792 | -6.39383 | -0.5467  |
| H | -2.15591 | 4.158067 | -4.87392 |
| H | 2.133808 | 4.195095 | 4.86537  |
| H | -4.20203 | -5.09405 | 2.242774 |
| H | 4.718556 | -3.55107 | -2.63054 |



### Crystallographic Data

Table S13 Crystallographic data for compounds [Cu·(1)<sub>2</sub>]PF<sub>6</sub>, **1**, **2**, and [Cu·(3)<sub>2</sub>]PF<sub>6</sub>

|                                                                             | [Cu·(1) <sub>2</sub> ]PF <sub>6</sub>                                            | [Cu·(3) <sub>2</sub> ]PF <sub>6</sub><br>·CH <sub>3</sub> CN                     | 1·2H <sub>2</sub> O                                           | 2·2H <sub>2</sub> O                                           |
|-----------------------------------------------------------------------------|----------------------------------------------------------------------------------|----------------------------------------------------------------------------------|---------------------------------------------------------------|---------------------------------------------------------------|
| Empirical formula                                                           | C <sub>52</sub> H <sub>40</sub> CuF <sub>6</sub> N <sub>4</sub> O <sub>4</sub> P | C <sub>58</sub> H <sub>51</sub> CuF <sub>6</sub> N <sub>5</sub> O <sub>4</sub> P | C <sub>26</sub> H <sub>24</sub> N <sub>2</sub> O <sub>4</sub> | C <sub>24</sub> H <sub>20</sub> N <sub>2</sub> O <sub>4</sub> |
| <i>M</i> (g mol <sup>-1</sup> )                                             | 993.39                                                                           | 1090.55                                                                          | 428.47                                                        | 400.42                                                        |
| <i>T</i> (K)                                                                | 100                                                                              | 100                                                                              | 173                                                           | 298                                                           |
| Crystal system, space group                                                 | Triclinic, <i>P</i> $\bar{1}$                                                    | Monoclinic, <i>C2/c</i>                                                          | Hexagonal,<br><i>P6</i> <sub>1</sub>                          | Monoclinic,<br><i>C2/c</i>                                    |
| <i>a</i> (Å)                                                                | 13.724(4)                                                                        | 8.3698(2)                                                                        | 17.652 (2)                                                    | 13.077(3)                                                     |
| <i>b</i> (Å)                                                                | 14.159(4)                                                                        | 32.873(6)                                                                        | 17.652 (2)                                                    | 10.396(2)                                                     |
| <i>c</i> (Å)                                                                | 14.164(4)                                                                        | 18.214(3)                                                                        | 12.122(1)                                                     | 15.667(3)                                                     |
| $\alpha$ (°)                                                                | 63.147(4)                                                                        |                                                                                  |                                                               |                                                               |
| $\beta$ (°)                                                                 | 61.260(3)                                                                        | 93.458(3)                                                                        |                                                               | 109.261(2)                                                    |
| $\gamma$ (°)                                                                | 73.411(4)                                                                        |                                                                                  |                                                               |                                                               |
| Volume (Å <sup>3</sup> )                                                    | 2145 (1)                                                                         | 5002(2)                                                                          | 3271.3(8)                                                     | 2010.7(8)                                                     |
| <i>Z</i>                                                                    | 2                                                                                | 4                                                                                | 6                                                             | 4                                                             |
| Calculated density (g cm <sup>-3</sup> )                                    | 1.538                                                                            | 1.448                                                                            | 1.305                                                         | 1.323                                                         |
| $\mu$ (mm <sup>-1</sup> )                                                   | 0.627                                                                            | 0.546                                                                            | 0.089                                                         | 0.091                                                         |
| <i>F</i> (0 0 0)                                                            | 1020                                                                             | 2256                                                                             | 1356                                                          | 840                                                           |
| Crystal size (mm), color                                                    | 0.18×0.15×0.06,<br>red                                                           | 0.18×0.07×0.02,<br>red                                                           | 0.27×0.13×0.<br>11, colorless                                 | 0.30×0.10×0.<br>10, yellow                                    |
| Reflections collected                                                       | 25825                                                                            | 30457                                                                            | 34388                                                         | 11772                                                         |
| Independent reflections<br>( <i>R</i> <sub>int</sub> )                      | 10029 (0.0625)                                                                   | 5955 (0.1083)                                                                    | 5011 (0.1313)                                                 | 2395 (0.0241)                                                 |
| Maximum and minimum<br>transmission                                         | 0.7456, 0.6260                                                                   | 0.9892, 0.9081                                                                   | 0.9903,<br>0.9765                                             | 0.9910,<br>0.9732                                             |
| Data/restraints/parameters                                                  | 10029 / 0 / 619                                                                  | 5955 / 0 / 354                                                                   | 5011 / 1 / 271                                                | 2395 / 3 / 148                                                |
| Goodness-of-fit on <i>F</i> <sup>2</sup>                                    | 1.075                                                                            | 1.007                                                                            | 1.047                                                         | 1.046                                                         |
| <i>R</i> <sub>1</sub> , <i>wR</i> <sub>2</sub> [ <i>I</i> > 2σ( <i>I</i> )] | 0.0713, 0.2050                                                                   | 0.0544, 0.0927                                                                   | 0.0809,<br>0.1659                                             | 0.0423,<br>0.1062                                             |
| <i>R</i> <sub>1</sub> , <i>wR</i> <sub>2</sub> (all data)                   | 0.0999, 0.2248                                                                   | 0.1174, 0.1103                                                                   | 0.1375,<br>0.1941                                             | 0.0619,<br>0.1183                                             |
| Largest difference peak and<br>hole (e <sup>-</sup> Å <sup>-3</sup> )       | 1.548 and -0.817                                                                 | 0.360 and -0.498                                                                 | 0.608 and -<br>0.210                                          | 0.263 and -<br>0.195                                          |

Table S14 Bond lengths [Å] and angles [°] for [Cu·(1)<sub>2</sub>]PF<sub>6</sub>

|            |          |
|------------|----------|
| Cu(1)-N(2) | 2.026(4) |
| Cu(1)-N(3) | 2.028(4) |
| Cu(1)-N(4) | 2.042(4) |
| Cu(1)-N(1) | 2.050(4) |
| P(1)-F(2)  | 1.571(4) |
| P(1)-F(1)  | 1.577(4) |
| P(1)-F(3)  | 1.586(4) |
| P(1)-F(5)  | 1.586(3) |
| P(1)-F(6)  | 1.595(4) |
| P(1)-F(4)  | 1.596(4) |
| O(1)-C(16) | 1.366(6) |
| O(1)-C(19) | 1.417(6) |
| O(2)-C(23) | 1.357(6) |
| O(2)-C(26) | 1.431(6) |
| O(3)-C(42) | 1.362(5) |
| O(3)-C(45) | 1.428(6) |
| O(4)-C(49) | 1.369(5) |
| O(4)-C(52) | 1.432(6) |
| N(1)-C(1)  | 1.328(6) |
| N(1)-C(12) | 1.361(6) |
| N(2)-C(10) | 1.343(6) |
| N(2)-C(11) | 1.362(6) |
| N(3)-C(27) | 1.337(6) |
| N(3)-C(38) | 1.367(6) |
| N(4)-C(36) | 1.336(6) |
| N(4)-C(37) | 1.365(5) |
| C(1)-C(2)  | 1.410(6) |
| C(1)-C(13) | 1.479(6) |
| C(2)-C(3)  | 1.366(7) |
| C(2)-H(2A) | 0.9500   |
| C(3)-C(4)  | 1.401(7) |
| C(3)-H(3A) | 0.9500   |
| C(4)-C(12) | 1.409(6) |
| C(4)-C(5)  | 1.441(7) |

|              |          |
|--------------|----------|
| C(5)-C(6)    | 1.336(8) |
| C(5)-H(5A)   | 0.9500   |
| C(6)-C(7)    | 1.432(7) |
| C(6)-H(6A)   | 0.9500   |
| C(7)-C(11)   | 1.405(6) |
| C(7)-C(8)    | 1.407(7) |
| C(8)-C(9)    | 1.358(7) |
| C(8)-H(8A)   | 0.9500   |
| C(9)-C(10)   | 1.411(6) |
| C(9)-H(9A)   | 0.9500   |
| C(10)-C(20)  | 1.477(6) |
| C(11)-C(12)  | 1.439(7) |
| C(13)-C(14)  | 1.395(6) |
| C(13)-C(18)  | 1.404(6) |
| C(14)-C(15)  | 1.379(7) |
| C(14)-H(14A) | 0.9500   |
| C(15)-C(16)  | 1.404(7) |
| C(15)-H(15A) | 0.9500   |
| C(16)-C(17)  | 1.392(7) |
| C(17)-C(18)  | 1.375(6) |
| C(17)-H(17A) | 0.9500   |
| C(18)-H(18A) | 0.9500   |
| C(19)-H(19A) | 0.9800   |
| C(19)-H(19B) | 0.9800   |
| C(19)-H(19C) | 0.9800   |
| C(20)-C(21)  | 1.387(6) |
| C(20)-C(25)  | 1.403(6) |
| C(21)-C(22)  | 1.395(7) |
| C(21)-H(21A) | 0.9500   |
| C(22)-C(23)  | 1.392(7) |
| C(22)-H(22A) | 0.9500   |
| C(23)-C(24)  | 1.397(7) |
| C(24)-C(25)  | 1.376(7) |
| C(24)-H(24A) | 0.9500   |
| C(25)-H(25A) | 0.9500   |
| C(26)-H(26A) | 0.9800   |

|              |          |
|--------------|----------|
| C(26)-H(26B) | 0.9800   |
| C(26)-H(26C) | 0.9800   |
| C(27)-C(28)  | 1.407(6) |
| C(27)-C(39)  | 1.475(6) |
| C(28)-C(29)  | 1.356(7) |
| C(28)-H(28A) | 0.9500   |
| C(29)-C(30)  | 1.408(7) |
| C(29)-H(29A) | 0.9500   |
| C(30)-C(38)  | 1.405(6) |
| C(30)-C(31)  | 1.429(6) |
| C(31)-C(32)  | 1.348(7) |
| C(31)-H(31A) | 0.9500   |
| C(32)-C(33)  | 1.429(6) |
| C(32)-H(32A) | 0.9500   |
| C(33)-C(37)  | 1.397(6) |
| C(33)-C(34)  | 1.412(7) |
| C(34)-C(35)  | 1.375(7) |
| C(34)-H(34A) | 0.9500   |
| C(35)-C(36)  | 1.416(6) |
| C(35)-H(35A) | 0.9500   |
| C(36)-C(46)  | 1.471(6) |
| C(37)-C(38)  | 1.442(6) |
| C(39)-C(44)  | 1.395(6) |
| C(39)-C(40)  | 1.405(6) |
| C(40)-C(41)  | 1.388(7) |
| C(40)-H(40A) | 0.9500   |
| C(41)-C(42)  | 1.384(7) |
| C(41)-H(41A) | 0.9500   |
| C(42)-C(43)  | 1.388(7) |
| C(43)-C(44)  | 1.369(6) |
| C(43)-H(43A) | 0.9500   |
| C(44)-H(44A) | 0.9500   |
| C(45)-H(45A) | 0.9800   |
| C(45)-H(45B) | 0.9800   |
| C(45)-H(45C) | 0.9800   |
| C(46)-C(47)  | 1.388(6) |

|                  |            |
|------------------|------------|
| C(46)-C(51)      | 1.397(6)   |
| C(47)-C(48)      | 1.378(7)   |
| C(47)-H(47A)     | 0.9500     |
| C(48)-C(49)      | 1.392(7)   |
| C(48)-H(48A)     | 0.9500     |
| C(49)-C(50)      | 1.390(7)   |
| C(50)-C(51)      | 1.395(6)   |
| C(50)-H(50A)     | 0.9500     |
| C(51)-H(51A)     | 0.9500     |
| C(52)-H(52A)     | 0.9800     |
| C(52)-H(52B)     | 0.9800     |
| C(52)-H(52C)     | 0.9800     |
|                  |            |
| N(2)-Cu(1)-N(3)  | 127.54(15) |
| N(2)-Cu(1)-N(4)  | 134.19(15) |
| N(3)-Cu(1)-N(4)  | 83.37(15)  |
| N(2)-Cu(1)-N(1)  | 83.08(15)  |
| N(3)-Cu(1)-N(1)  | 129.77(15) |
| N(4)-Cu(1)-N(1)  | 102.73(15) |
| F(2)-P(1)-F(1)   | 91.0(3)    |
| F(2)-P(1)-F(3)   | 89.5(2)    |
| F(1)-P(1)-F(3)   | 178.8(3)   |
| F(2)-P(1)-F(5)   | 90.4(2)    |
| F(1)-P(1)-F(5)   | 91.2(3)    |
| F(3)-P(1)-F(5)   | 89.9(2)    |
| F(2)-P(1)-F(6)   | 91.4(2)    |
| F(1)-P(1)-F(6)   | 90.2(2)    |
| F(3)-P(1)-F(6)   | 88.6(2)    |
| F(5)-P(1)-F(6)   | 177.7(2)   |
| F(2)-P(1)-F(4)   | 178.7(2)   |
| F(1)-P(1)-F(4)   | 89.2(2)    |
| F(3)-P(1)-F(4)   | 90.4(2)    |
| F(5)-P(1)-F(4)   | 88.35(19)  |
| F(6)-P(1)-F(4)   | 89.9(2)    |
| C(16)-O(1)-C(19) | 118.2(4)   |
| C(23)-O(2)-C(26) | 117.3(4)   |

|                  |          |
|------------------|----------|
| C(42)-O(3)-C(45) | 117.1(4) |
| C(49)-O(4)-C(52) | 117.1(4) |
| C(1)-N(1)-C(12)  | 119.0(4) |
| C(1)-N(1)-Cu(1)  | 128.9(3) |
| C(12)-N(1)-Cu(1) | 110.2(3) |
| C(10)-N(2)-C(11) | 118.7(4) |
| C(10)-N(2)-Cu(1) | 130.3(3) |
| C(11)-N(2)-Cu(1) | 110.9(3) |
| C(27)-N(3)-C(38) | 118.6(4) |
| C(27)-N(3)-Cu(1) | 130.7(3) |
| C(38)-N(3)-Cu(1) | 110.5(3) |
| C(36)-N(4)-C(37) | 119.1(4) |
| C(36)-N(4)-Cu(1) | 128.9(3) |
| C(37)-N(4)-Cu(1) | 110.0(3) |
| N(1)-C(1)-C(2)   | 121.6(4) |
| N(1)-C(1)-C(13)  | 117.2(4) |
| C(2)-C(1)-C(13)  | 121.2(4) |
| C(3)-C(2)-C(1)   | 119.5(5) |
| C(3)-C(2)-H(2A)  | 120.3    |
| C(1)-C(2)-H(2A)  | 120.3    |
| C(2)-C(3)-C(4)   | 120.1(4) |
| C(2)-C(3)-H(3A)  | 120.0    |
| C(4)-C(3)-H(3A)  | 120.0    |
| C(3)-C(4)-C(12)  | 117.1(4) |
| C(3)-C(4)-C(5)   | 124.8(4) |
| C(12)-C(4)-C(5)  | 118.1(5) |
| C(6)-C(5)-C(4)   | 121.6(5) |
| C(6)-C(5)-H(5A)  | 119.2    |
| C(4)-C(5)-H(5A)  | 119.2    |
| C(5)-C(6)-C(7)   | 121.1(4) |
| C(5)-C(6)-H(6A)  | 119.4    |
| C(7)-C(6)-H(6A)  | 119.4    |
| C(11)-C(7)-C(8)  | 116.7(4) |
| C(11)-C(7)-C(6)  | 119.5(5) |
| C(8)-C(7)-C(6)   | 123.7(4) |
| C(9)-C(8)-C(7)   | 119.9(4) |

|                     |          |
|---------------------|----------|
| C(9)-C(8)-H(8A)     | 120.1    |
| C(7)-C(8)-H(8A)     | 120.1    |
| C(8)-C(9)-C(10)     | 120.7(5) |
| C(8)-C(9)-H(9A)     | 119.6    |
| C(10)-C(9)-H(9A)    | 119.6    |
| N(2)-C(10)-C(9)     | 120.6(4) |
| N(2)-C(10)-C(20)    | 118.6(4) |
| C(9)-C(10)-C(20)    | 120.8(4) |
| N(2)-C(11)-C(7)     | 123.3(4) |
| N(2)-C(11)-C(12)    | 117.8(4) |
| C(7)-C(11)-C(12)    | 118.9(4) |
| N(1)-C(12)-C(4)     | 122.4(4) |
| N(1)-C(12)-C(11)    | 117.3(4) |
| C(4)-C(12)-C(11)    | 120.3(4) |
| C(14)-C(13)-C(18)   | 118.4(4) |
| C(14)-C(13)-C(1)    | 121.6(4) |
| C(18)-C(13)-C(1)    | 120.0(4) |
| C(15)-C(14)-C(13)   | 121.1(4) |
| C(15)-C(14)-H(14A)  | 119.5    |
| C(13)-C(14)-H(14A)  | 119.5    |
| C(14)-C(15)-C(16)   | 119.9(4) |
| C(14)-C(15)-H(15A)  | 120.1    |
| C(16)-C(15)-H(15A)  | 120.1    |
| O(1)-C(16)-C(17)    | 115.8(4) |
| O(1)-C(16)-C(15)    | 124.8(4) |
| C(17)-C(16)-C(15)   | 119.4(4) |
| C(18)-C(17)-C(16)   | 120.3(4) |
| C(18)-C(17)-H(17A)  | 119.8    |
| C(16)-C(17)-H(17A)  | 119.8    |
| C(17)-C(18)-C(13)   | 120.9(4) |
| C(17)-C(18)-H(18A)  | 119.6    |
| C(13)-C(18)-H(18A)  | 119.6    |
| O(1)-C(19)-H(19A)   | 109.5    |
| O(1)-C(19)-H(19B)   | 109.5    |
| H(19A)-C(19)-H(19B) | 109.5    |
| O(1)-C(19)-H(19C)   | 109.5    |

|                     |          |
|---------------------|----------|
| H(19A)-C(19)-H(19C) | 109.5    |
| H(19B)-C(19)-H(19C) | 109.5    |
| C(21)-C(20)-C(25)   | 117.7(4) |
| C(21)-C(20)-C(10)   | 121.0(4) |
| C(25)-C(20)-C(10)   | 121.3(4) |
| C(20)-C(21)-C(22)   | 122.2(4) |
| C(20)-C(21)-H(21A)  | 118.9    |
| C(22)-C(21)-H(21A)  | 118.9    |
| C(23)-C(22)-C(21)   | 118.8(4) |
| C(23)-C(22)-H(22A)  | 120.6    |
| C(21)-C(22)-H(22A)  | 120.6    |
| O(2)-C(23)-C(22)    | 124.9(4) |
| O(2)-C(23)-C(24)    | 115.1(4) |
| C(22)-C(23)-C(24)   | 120.0(4) |
| C(25)-C(24)-C(23)   | 120.1(4) |
| C(25)-C(24)-H(24A)  | 119.9    |
| C(23)-C(24)-H(24A)  | 119.9    |
| C(24)-C(25)-C(20)   | 121.2(4) |
| C(24)-C(25)-H(25A)  | 119.4    |
| C(20)-C(25)-H(25A)  | 119.4    |
| O(2)-C(26)-H(26A)   | 109.5    |
| O(2)-C(26)-H(26B)   | 109.5    |
| H(26A)-C(26)-H(26B) | 109.5    |
| O(2)-C(26)-H(26C)   | 109.5    |
| H(26A)-C(26)-H(26C) | 109.5    |
| H(26B)-C(26)-H(26C) | 109.5    |
| N(3)-C(27)-C(28)    | 120.8(4) |
| N(3)-C(27)-C(39)    | 118.0(4) |
| C(28)-C(27)-C(39)   | 121.2(4) |
| C(29)-C(28)-C(27)   | 121.0(4) |
| C(29)-C(28)-H(28A)  | 119.5    |
| C(27)-C(28)-H(28A)  | 119.5    |
| C(28)-C(29)-C(30)   | 119.5(4) |
| C(28)-C(29)-H(29A)  | 120.2    |
| C(30)-C(29)-H(29A)  | 120.2    |
| C(38)-C(30)-C(29)   | 116.9(4) |



|                    |          |
|--------------------|----------|
| C(38)-C(30)-C(31)  | 119.5(4) |
| C(29)-C(30)-C(31)  | 123.6(4) |
| C(32)-C(31)-C(30)  | 121.4(4) |
| C(32)-C(31)-H(31A) | 119.3    |
| C(30)-C(31)-H(31A) | 119.3    |
| C(31)-C(32)-C(33)  | 120.1(4) |
| C(31)-C(32)-H(32A) | 119.9    |
| C(33)-C(32)-H(32A) | 119.9    |
| C(37)-C(33)-C(34)  | 116.5(4) |
| C(37)-C(33)-C(32)  | 120.5(4) |
| C(34)-C(33)-C(32)  | 122.9(4) |
| C(35)-C(34)-C(33)  | 120.6(4) |
| C(35)-C(34)-H(34A) | 119.7    |
| C(33)-C(34)-H(34A) | 119.7    |
| C(34)-C(35)-C(36)  | 119.2(4) |
| C(34)-C(35)-H(35A) | 120.4    |
| C(36)-C(35)-H(35A) | 120.4    |
| N(4)-C(36)-C(35)   | 121.2(4) |
| N(4)-C(36)-C(46)   | 117.1(4) |
| C(35)-C(36)-C(46)  | 121.6(4) |
| N(4)-C(37)-C(33)   | 123.4(4) |
| N(4)-C(37)-C(38)   | 117.5(4) |
| C(33)-C(37)-C(38)  | 119.1(4) |
| N(3)-C(38)-C(30)   | 123.1(4) |
| N(3)-C(38)-C(37)   | 117.6(4) |
| C(30)-C(38)-C(37)  | 119.3(4) |
| C(44)-C(39)-C(40)  | 117.7(4) |
| C(44)-C(39)-C(27)  | 122.0(4) |
| C(40)-C(39)-C(27)  | 120.3(4) |
| C(41)-C(40)-C(39)  | 120.9(4) |
| C(41)-C(40)-H(40A) | 119.5    |
| C(39)-C(40)-H(40A) | 119.5    |
| C(42)-C(41)-C(40)  | 119.9(4) |
| C(42)-C(41)-H(41A) | 120.1    |
| C(40)-C(41)-H(41A) | 120.1    |
| O(3)-C(42)-C(41)   | 125.0(4) |

|                     |          |
|---------------------|----------|
| O(3)-C(42)-C(43)    | 115.5(4) |
| C(41)-C(42)-C(43)   | 119.5(4) |
| C(44)-C(43)-C(42)   | 120.6(4) |
| C(44)-C(43)-H(43A)  | 119.7    |
| C(42)-C(43)-H(43A)  | 119.7    |
| C(43)-C(44)-C(39)   | 121.3(4) |
| C(43)-C(44)-H(44A)  | 119.4    |
| C(39)-C(44)-H(44A)  | 119.4    |
| O(3)-C(45)-H(45A)   | 109.5    |
| O(3)-C(45)-H(45B)   | 109.5    |
| H(45A)-C(45)-H(45B) | 109.5    |
| O(3)-C(45)-H(45C)   | 109.5    |
| H(45A)-C(45)-H(45C) | 109.5    |
| H(45B)-C(45)-H(45C) | 109.5    |
| C(47)-C(46)-C(51)   | 118.1(4) |
| C(47)-C(46)-C(36)   | 119.8(4) |
| C(51)-C(46)-C(36)   | 122.0(4) |
| C(48)-C(47)-C(46)   | 121.6(4) |
| C(48)-C(47)-H(47A)  | 119.2    |
| C(46)-C(47)-H(47A)  | 119.2    |
| C(47)-C(48)-C(49)   | 119.8(4) |
| C(47)-C(48)-H(48A)  | 120.1    |
| C(49)-C(48)-H(48A)  | 120.1    |
| O(4)-C(49)-C(50)    | 124.3(4) |
| O(4)-C(49)-C(48)    | 115.8(4) |
| C(50)-C(49)-C(48)   | 119.9(4) |
| C(49)-C(50)-C(51)   | 119.5(4) |
| C(49)-C(50)-H(50A)  | 120.2    |
| C(51)-C(50)-H(50A)  | 120.2    |
| C(50)-C(51)-C(46)   | 121.0(4) |
| C(50)-C(51)-H(51A)  | 119.5    |
| C(46)-C(51)-H(51A)  | 119.5    |
| O(4)-C(52)-H(52A)   | 109.5    |
| O(4)-C(52)-H(52B)   | 109.5    |
| H(52A)-C(52)-H(52B) | 109.5    |
| O(4)-C(52)-H(52C)   | 109.5    |

|                     |       |
|---------------------|-------|
| H(52A)-C(52)-H(52C) | 109.5 |
| H(52B)-C(52)-H(52C) | 109.  |

Table S15 Bond lengths [Å] and angles [°] for [Cu·(3)<sub>2</sub>]PF<sub>6</sub>

|              |            |
|--------------|------------|
| Cu(1)-N(1)   | 2.049(2)   |
| Cu(1)-N(1)#1 | 2.049(2)   |
| Cu(1)-N(2)   | 2.050(2)   |
| Cu(1)-N(2)#1 | 2.050(2)   |
| P(1)-F(2)#1  | 1.589(2)   |
| P(1)-F(2)    | 1.589(2)   |
| P(1)-F(1)#1  | 1.592(2)   |
| P(1)-F(1)    | 1.592(2)   |
| P(1)-F(3)    | 1.6018(18) |
| P(1)-F(3)#1  | 1.6018(18) |
| O(1)-C(16)   | 1.370(3)   |
| O(1)-C(19)   | 1.429(3)   |
| O(2)-C(24)   | 1.371(3)   |
| O(2)-C(27)   | 1.435(3)   |
| N(1)-C(1)    | 1.345(3)   |
| N(1)-C(12)   | 1.367(3)   |
| N(2)-C(10)   | 1.343(3)   |
| N(2)-C(11)   | 1.371(3)   |
| N(31)-C(31)  | 1.134(10)  |
| C(1)-C(2)    | 1.409(4)   |
| C(1)-C(13)   | 1.475(4)   |
| C(2)-C(3)    | 1.360(4)   |
| C(2)-H(2A)   | 0.9500     |
| C(3)-C(4)    | 1.402(4)   |
| C(3)-H(3A)   | 0.9500     |
| C(4)-C(12)   | 1.405(4)   |
| C(4)-C(5)    | 1.427(4)   |
| C(5)-C(6)    | 1.346(4)   |
| C(5)-H(5A)   | 0.9500     |
| C(6)-C(7)    | 1.427(4)   |
| C(6)-H(6A)   | 0.9500     |

|              |          |
|--------------|----------|
| C(7)-C(8)    | 1.408(4) |
| C(7)-C(11)   | 1.410(4) |
| C(8)-C(9)    | 1.348(4) |
| C(8)-H(8A)   | 0.9500   |
| C(9)-C(10)   | 1.422(4) |
| C(9)-H(9A)   | 0.9500   |
| C(10)-C(21)  | 1.465(4) |
| C(11)-C(12)  | 1.441(4) |
| C(13)-C(14)  | 1.389(4) |
| C(13)-C(18)  | 1.399(4) |
| C(14)-C(15)  | 1.382(4) |
| C(14)-H(14A) | 0.9500   |
| C(15)-C(16)  | 1.389(4) |
| C(15)-H(15A) | 0.9500   |
| C(16)-C(17)  | 1.407(4) |
| C(17)-C(18)  | 1.376(4) |
| C(17)-C(20)  | 1.511(4) |
| C(18)-H(18A) | 0.9500   |
| C(19)-H(19A) | 0.9800   |
| C(19)-H(19B) | 0.9800   |
| C(19)-H(19C) | 0.9800   |
| C(20)-H(20A) | 0.9800   |
| C(20)-H(20B) | 0.9800   |
| C(20)-H(20C) | 0.9800   |
| C(21)-C(22)  | 1.392(4) |
| C(21)-C(26)  | 1.404(4) |
| C(22)-C(23)  | 1.377(4) |
| C(22)-H(22A) | 0.9500   |
| C(23)-C(24)  | 1.378(4) |
| C(23)-H(23A) | 0.9500   |
| C(24)-C(25)  | 1.409(4) |
| C(25)-C(26)  | 1.381(4) |
| C(25)-C(28)  | 1.493(4) |
| C(26)-H(26A) | 0.9500   |
| C(27)-H(27A) | 0.9800   |
| C(27)-H(27B) | 0.9800   |

|                     |            |
|---------------------|------------|
| C(27)-H(27C)        | 0.9800     |
| C(28)-H(28A)        | 0.9800     |
| C(28)-H(28B)        | 0.9800     |
| C(28)-H(28C)        | 0.9800     |
| C(31)-C(32)         | 1.643(9)   |
| C(32)-H(32A)        | 0.9800     |
| C(32)-H(32B)        | 0.9800     |
| C(32)-H(32C)        | 0.9800     |
|                     |            |
| N(1)-Cu(1)-N(1)#1   | 114.35(12) |
| N(1)-Cu(1)-N(2)     | 83.00(9)   |
| N(1)#1-Cu(1)-N(2)   | 134.13(9)  |
| N(1)-Cu(1)-N(2)#1   | 134.13(9)  |
| N(1)#1-Cu(1)-N(2)#1 | 83.00(9)   |
| N(2)-Cu(1)-N(2)#1   | 116.02(13) |
| F(2)#1-P(1)-F(2)    | 90.43(17)  |
| F(2)#1-P(1)-F(1)#1  | 89.69(12)  |
| F(2)-P(1)-F(1)#1    | 179.71(13) |
| F(2)#1-P(1)-F(1)    | 179.71(13) |
| F(2)-P(1)-F(1)      | 89.69(12)  |
| F(1)#1-P(1)-F(1)    | 90.18(18)  |
| F(2)#1-P(1)-F(3)    | 90.12(10)  |
| F(2)-P(1)-F(3)      | 89.81(10)  |
| F(1)#1-P(1)-F(3)    | 90.45(10)  |
| F(1)-P(1)-F(3)      | 89.62(10)  |
| F(2)#1-P(1)-F(3)#1  | 89.80(10)  |
| F(2)-P(1)-F(3)#1    | 90.11(10)  |
| F(1)#1-P(1)-F(3)#1  | 89.63(10)  |
| F(1)-P(1)-F(3)#1    | 90.46(10)  |
| F(3)-P(1)-F(3)#1    | 179.89(15) |
| C(16)-O(1)-C(19)    | 117.0(2)   |
| C(24)-O(2)-C(27)    | 116.8(3)   |
| C(1)-N(1)-C(12)     | 118.4(2)   |
| C(1)-N(1)-Cu(1)     | 130.69(18) |
| C(12)-N(1)-Cu(1)    | 110.81(18) |
| C(10)-N(2)-C(11)    | 118.3(2)   |

|                  |            |
|------------------|------------|
| C(10)-N(2)-Cu(1) | 130.92(19) |
| C(11)-N(2)-Cu(1) | 110.53(18) |
| N(1)-C(1)-C(2)   | 121.1(3)   |
| N(1)-C(1)-C(13)  | 119.1(2)   |
| C(2)-C(1)-C(13)  | 119.8(2)   |
| C(3)-C(2)-C(1)   | 120.3(3)   |
| C(3)-C(2)-H(2A)  | 119.8      |
| C(1)-C(2)-H(2A)  | 119.8      |
| C(2)-C(3)-C(4)   | 120.0(3)   |
| C(2)-C(3)-H(3A)  | 120.0      |
| C(4)-C(3)-H(3A)  | 120.0      |
| C(3)-C(4)-C(12)  | 117.1(3)   |
| C(3)-C(4)-C(5)   | 122.9(3)   |
| C(12)-C(4)-C(5)  | 119.9(3)   |
| C(6)-C(5)-C(4)   | 120.8(3)   |
| C(6)-C(5)-H(5A)  | 119.6      |
| C(4)-C(5)-H(5A)  | 119.6      |
| C(5)-C(6)-C(7)   | 121.0(3)   |
| C(5)-C(6)-H(6A)  | 119.5      |
| C(7)-C(6)-H(6A)  | 119.5      |
| C(8)-C(7)-C(11)  | 116.9(3)   |
| C(8)-C(7)-C(6)   | 123.2(3)   |
| C(11)-C(7)-C(6)  | 119.9(3)   |
| C(9)-C(8)-C(7)   | 119.9(3)   |
| C(9)-C(8)-H(8A)  | 120.1      |
| C(7)-C(8)-H(8A)  | 120.1      |
| C(8)-C(9)-C(10)  | 121.0(3)   |
| C(8)-C(9)-H(9A)  | 119.5      |
| C(10)-C(9)-H(9A) | 119.5      |
| N(2)-C(10)-C(9)  | 120.7(3)   |
| N(2)-C(10)-C(21) | 119.8(3)   |
| C(9)-C(10)-C(21) | 119.5(3)   |
| N(2)-C(11)-C(7)  | 123.3(3)   |
| N(2)-C(11)-C(12) | 117.8(2)   |
| C(7)-C(11)-C(12) | 118.9(3)   |
| N(1)-C(12)-C(4)  | 123.0(3)   |

|                     |          |
|---------------------|----------|
| N(1)-C(12)-C(11)    | 117.7(2) |
| C(4)-C(12)-C(11)    | 119.3(3) |
| C(14)-C(13)-C(18)   | 117.9(3) |
| C(14)-C(13)-C(1)    | 120.3(2) |
| C(18)-C(13)-C(1)    | 121.8(2) |
| C(15)-C(14)-C(13)   | 121.1(3) |
| C(15)-C(14)-H(14A)  | 119.4    |
| C(13)-C(14)-H(14A)  | 119.4    |
| C(14)-C(15)-C(16)   | 119.9(3) |
| C(14)-C(15)-H(15A)  | 120.0    |
| C(16)-C(15)-H(15A)  | 120.0    |
| O(1)-C(16)-C(15)    | 124.2(3) |
| O(1)-C(16)-C(17)    | 115.6(2) |
| C(15)-C(16)-C(17)   | 120.2(3) |
| C(18)-C(17)-C(16)   | 118.2(2) |
| C(18)-C(17)-C(20)   | 121.0(3) |
| C(16)-C(17)-C(20)   | 120.8(2) |
| C(17)-C(18)-C(13)   | 122.5(3) |
| C(17)-C(18)-H(18A)  | 118.7    |
| C(13)-C(18)-H(18A)  | 118.7    |
| O(1)-C(19)-H(19A)   | 109.5    |
| O(1)-C(19)-H(19B)   | 109.5    |
| H(19A)-C(19)-H(19B) | 109.5    |
| O(1)-C(19)-H(19C)   | 109.5    |
| H(19A)-C(19)-H(19C) | 109.5    |
| H(19B)-C(19)-H(19C) | 109.5    |
| C(17)-C(20)-H(20A)  | 109.5    |
| C(17)-C(20)-H(20B)  | 109.5    |
| H(20A)-C(20)-H(20B) | 109.5    |
| C(17)-C(20)-H(20C)  | 109.5    |
| H(20A)-C(20)-H(20C) | 109.5    |
| H(20B)-C(20)-H(20C) | 109.5    |
| C(22)-C(21)-C(26)   | 117.3(3) |
| C(22)-C(21)-C(10)   | 120.5(3) |
| C(26)-C(21)-C(10)   | 122.1(3) |
| C(23)-C(22)-C(21)   | 121.4(3) |

|                     |          |
|---------------------|----------|
| C(23)-C(22)-H(22A)  | 119.3    |
| C(21)-C(22)-H(22A)  | 119.3    |
| C(22)-C(23)-C(24)   | 119.9(3) |
| C(22)-C(23)-H(23A)  | 120.0    |
| C(24)-C(23)-H(23A)  | 120.0    |
| O(2)-C(24)-C(23)    | 124.6(3) |
| O(2)-C(24)-C(25)    | 114.2(3) |
| C(23)-C(24)-C(25)   | 121.1(3) |
| C(26)-C(25)-C(24)   | 117.3(3) |
| C(26)-C(25)-C(28)   | 121.8(3) |
| C(24)-C(25)-C(28)   | 120.8(3) |
| C(25)-C(26)-C(21)   | 122.9(3) |
| C(25)-C(26)-H(26A)  | 118.6    |
| C(21)-C(26)-H(26A)  | 118.6    |
| O(2)-C(27)-H(27A)   | 109.5    |
| O(2)-C(27)-H(27B)   | 109.5    |
| H(27A)-C(27)-H(27B) | 109.5    |
| O(2)-C(27)-H(27C)   | 109.5    |
| H(27A)-C(27)-H(27C) | 109.5    |
| H(27B)-C(27)-H(27C) | 109.5    |
| C(25)-C(28)-H(28A)  | 109.5    |
| C(25)-C(28)-H(28B)  | 109.5    |
| H(28A)-C(28)-H(28B) | 109.5    |
| C(25)-C(28)-H(28C)  | 109.5    |
| H(28A)-C(28)-H(28C) | 109.5    |
| H(28B)-C(28)-H(28C) | 109.5    |
| N(31)-C(31)-C(32)   | 176.6(9) |
| C(31)-C(32)-H(32A)  | 109.5    |
| C(31)-C(32)-H(32B)  | 109.5    |
| H(32A)-C(32)-H(32B) | 109.5    |
| C(31)-C(32)-H(32C)  | 109.5    |
| H(32A)-C(32)-H(32C) | 109.5    |
| H(32B)-C(32)-H(32C) | 109.5    |

---

Symmetry transformations used to generate equivalent atoms:

#1 -x,y,-z+0.5



Table S16 Bond lengths [Å] and angles [°] for **1**

|              |           |
|--------------|-----------|
| O(1)-C(16)   | 1.375(7)  |
| O(1)-C(19)   | 1.437(9)  |
| O(2)-C(23)   | 1.363(7)  |
| O(2)-C(26)   | 1.440(8)  |
| N(1)-C(1)    | 1.348(7)  |
| N(1)-C(12)   | 1.368(8)  |
| N(2)-C(10)   | 1.338(7)  |
| N(2)-C(11)   | 1.378(7)  |
| C(1)-C(2)    | 1.409(8)  |
| C(1)-C(13)   | 1.498(8)  |
| C(2)-C(3)    | 1.364(9)  |
| C(2)-H(2B)   | 0.9500    |
| C(3)-C(4)    | 1.413(9)  |
| C(3)-H(3A)   | 0.9500    |
| C(4)-C(12)   | 1.414(8)  |
| C(4)-C(5)    | 1.430(9)  |
| C(5)-C(6)    | 1.356(9)  |
| C(5)-H(5A)   | 0.9500    |
| C(6)-C(7)    | 1.414(8)  |
| C(6)-H(6A)   | 0.9500    |
| C(7)-C(11)   | 1.407(8)  |
| C(7)-C(8)    | 1.413(9)  |
| C(8)-C(9)    | 1.370(9)  |
| C(8)-H(8A)   | 0.9500    |
| C(9)-C(10)   | 1.425(8)  |
| C(9)-H(9A)   | 0.9500    |
| C(10)-C(20)  | 1.497(8)  |
| C(11)-C(12)  | 1.465(8)  |
| C(13)-C(14)  | 1.381(8)  |
| C(13)-C(18)  | 1.417(8)  |
| C(14)-C(15)  | 1.387(10) |
| C(14)-H(14A) | 0.9500    |
| C(15)-C(16)  | 1.380(9)  |
| C(15)-H(15A) | 0.9500    |

|                  |          |
|------------------|----------|
| C(16)-C(17)      | 1.394(9) |
| C(17)-C(18)      | 1.368(8) |
| C(17)-H(17A)     | 0.9500   |
| C(18)-H(18A)     | 0.9500   |
| C(19)-H(19A)     | 0.9800   |
| C(19)-H(19B)     | 0.9800   |
| C(19)-H(19C)     | 0.9800   |
| C(20)-C(25)      | 1.375(8) |
| C(20)-C(21)      | 1.397(8) |
| C(21)-C(22)      | 1.376(8) |
| C(21)-H(21A)     | 0.9500   |
| C(22)-C(23)      | 1.405(8) |
| C(22)-H(22A)     | 0.9500   |
| C(23)-C(24)      | 1.393(8) |
| C(24)-C(25)      | 1.417(8) |
| C(24)-H(24A)     | 0.9500   |
| C(25)-H(25A)     | 0.9500   |
| C(26)-H(26A)     | 0.9800   |
| C(26)-H(26B)     | 0.9800   |
| C(26)-H(26C)     | 0.9800   |
|                  |          |
| C(16)-O(1)-C(19) | 117.0(6) |
| C(23)-O(2)-C(26) | 116.5(5) |
| C(1)-N(1)-C(12)  | 118.8(5) |
| C(10)-N(2)-C(11) | 118.3(5) |
| N(1)-C(1)-C(2)   | 121.5(6) |
| N(1)-C(1)-C(13)  | 115.8(5) |
| C(2)-C(1)-C(13)  | 122.6(6) |
| C(3)-C(2)-C(1)   | 119.8(6) |
| C(3)-C(2)-H(2B)  | 120.1    |
| C(1)-C(2)-H(2B)  | 120.1    |
| C(2)-C(3)-C(4)   | 120.3(6) |
| C(2)-C(3)-H(3A)  | 119.8    |
| C(4)-C(3)-H(3A)  | 119.8    |
| C(3)-C(4)-C(12)  | 116.9(6) |
| C(3)-C(4)-C(5)   | 123.0(6) |

|                    |          |
|--------------------|----------|
| C(12)-C(4)-C(5)    | 120.0(6) |
| C(6)-C(5)-C(4)     | 120.4(6) |
| C(6)-C(5)-H(5A)    | 119.8    |
| C(4)-C(5)-H(5A)    | 119.8    |
| C(5)-C(6)-C(7)     | 122.2(6) |
| C(5)-C(6)-H(6A)    | 118.9    |
| C(7)-C(6)-H(6A)    | 118.9    |
| C(11)-C(7)-C(8)    | 117.4(5) |
| C(11)-C(7)-C(6)    | 119.3(6) |
| C(8)-C(7)-C(6)     | 123.3(6) |
| C(9)-C(8)-C(7)     | 119.6(6) |
| C(9)-C(8)-H(8A)    | 120.2    |
| C(7)-C(8)-H(8A)    | 120.2    |
| C(8)-C(9)-C(10)    | 120.0(6) |
| C(8)-C(9)-H(9A)    | 120.0    |
| C(10)-C(9)-H(9A)   | 120.0    |
| N(2)-C(10)-C(9)    | 121.6(5) |
| N(2)-C(10)-C(20)   | 117.1(5) |
| C(9)-C(10)-C(20)   | 121.3(5) |
| N(2)-C(11)-C(7)    | 123.1(5) |
| N(2)-C(11)-C(12)   | 117.2(5) |
| C(7)-C(11)-C(12)   | 119.6(5) |
| N(1)-C(12)-C(4)    | 122.5(5) |
| N(1)-C(12)-C(11)   | 119.1(5) |
| C(4)-C(12)-C(11)   | 118.4(5) |
| C(14)-C(13)-C(18)  | 117.4(6) |
| C(14)-C(13)-C(1)   | 122.6(5) |
| C(18)-C(13)-C(1)   | 119.9(5) |
| C(13)-C(14)-C(15)  | 122.3(6) |
| C(13)-C(14)-H(14A) | 118.9    |
| C(15)-C(14)-H(14A) | 118.9    |
| C(16)-C(15)-C(14)  | 119.5(6) |
| C(16)-C(15)-H(15A) | 120.2    |
| C(14)-C(15)-H(15A) | 120.2    |
| O(1)-C(16)-C(15)   | 125.2(6) |
| O(1)-C(16)-C(17)   | 115.4(6) |

|                     |          |
|---------------------|----------|
| C(15)-C(16)-C(17)   | 119.3(6) |
| C(18)-C(17)-C(16)   | 121.0(6) |
| C(18)-C(17)-H(17A)  | 119.5    |
| C(16)-C(17)-H(17A)  | 119.5    |
| C(17)-C(18)-C(13)   | 120.5(6) |
| C(17)-C(18)-H(18A)  | 119.8    |
| C(13)-C(18)-H(18A)  | 119.8    |
| O(1)-C(19)-H(19A)   | 109.5    |
| O(1)-C(19)-H(19B)   | 109.5    |
| H(19A)-C(19)-H(19B) | 109.5    |
| O(1)-C(19)-H(19C)   | 109.5    |
| H(19A)-C(19)-H(19C) | 109.5    |
| H(19B)-C(19)-H(19C) | 109.5    |
| C(25)-C(20)-C(21)   | 118.8(5) |
| C(25)-C(20)-C(10)   | 120.5(5) |
| C(21)-C(20)-C(10)   | 120.8(5) |
| C(22)-C(21)-C(20)   | 121.5(6) |
| C(22)-C(21)-H(21A)  | 119.2    |
| C(20)-C(21)-H(21A)  | 119.2    |
| C(21)-C(22)-C(23)   | 119.7(6) |
| C(21)-C(22)-H(22A)  | 120.1    |
| C(23)-C(22)-H(22A)  | 120.1    |
| O(2)-C(23)-C(24)    | 124.1(5) |
| O(2)-C(23)-C(22)    | 116.0(5) |
| C(24)-C(23)-C(22)   | 119.8(5) |
| C(23)-C(24)-C(25)   | 119.0(5) |
| C(23)-C(24)-H(24A)  | 120.5    |
| C(25)-C(24)-H(24A)  | 120.5    |
| C(20)-C(25)-C(24)   | 121.2(6) |
| C(20)-C(25)-H(25A)  | 119.4    |
| C(24)-C(25)-H(25A)  | 119.4    |
| O(2)-C(26)-H(26A)   | 109.5    |
| O(2)-C(26)-H(26B)   | 109.5    |
| H(26A)-C(26)-H(26B) | 109.5    |
| O(2)-C(26)-H(26C)   | 109.5    |
| H(26A)-C(26)-H(26C) | 109.5    |

H(26B)-C(26)-H(26C) 109.5

Table S17 Bond lengths [Å] and angles [°] for **2**

|                  |            |
|------------------|------------|
| O(1)-C(10)       | 1.3656(17) |
| O(1)-H(1A)       | 0.986(16)  |
| O(2)-H(2C)       | 0.907(15)  |
| O(2)-H(2B)       | 0.919(15)  |
| N(1)-C(1)        | 1.3376(16) |
| N(1)-C(6)        | 1.3555(16) |
| C(1)-C(2)        | 1.4095(19) |
| C(1)-C(7)        | 1.4786(19) |
| C(2)-C(3)        | 1.354(2)   |
| C(2)-H(2A)       | 0.9300     |
| C(3)-C(4)        | 1.408(2)   |
| C(3)-H(3A)       | 0.9300     |
| C(4)-C(6)        | 1.4100(19) |
| C(4)-C(5)        | 1.427(2)   |
| C(5)-C(5)#1      | 1.339(3)   |
| C(5)-H(5A)       | 0.9300     |
| C(6)-C(6)#1      | 1.457(3)   |
| C(7)-C(12)       | 1.3918(19) |
| C(7)-C(8)        | 1.3962(19) |
| C(8)-C(9)        | 1.381(2)   |
| C(8)-H(8A)       | 0.9300     |
| C(9)-C(10)       | 1.380(2)   |
| C(9)-H(9A)       | 0.9300     |
| C(10)-C(11)      | 1.383(2)   |
| C(11)-C(12)      | 1.376(2)   |
| C(11)-H(11A)     | 0.9300     |
| C(12)-H(12A)     | 0.9300     |
| <br>             |            |
| C(10)-O(1)-H(1A) | 109.6(13)  |
| H(2C)-O(2)-H(2B) | 101.4(17)  |
| C(1)-N(1)-C(6)   | 118.98(11) |
| N(1)-C(1)-C(2)   | 121.35(13) |

|                    |            |
|--------------------|------------|
| N(1)-C(1)-C(7)     | 116.50(12) |
| C(2)-C(1)-C(7)     | 122.15(12) |
| C(3)-C(2)-C(1)     | 119.91(14) |
| C(3)-C(2)-H(2A)    | 120.0      |
| C(1)-C(2)-H(2A)    | 120.0      |
| C(2)-C(3)-C(4)     | 120.18(13) |
| C(2)-C(3)-H(3A)    | 119.9      |
| C(4)-C(3)-H(3A)    | 119.9      |
| C(3)-C(4)-C(6)     | 116.89(13) |
| C(3)-C(4)-C(5)     | 122.96(13) |
| C(6)-C(4)-C(5)     | 120.14(14) |
| C(5)#1-C(5)-C(4)   | 121.10(9)  |
| C(5)#1-C(5)-H(5A)  | 119.5      |
| C(4)-C(5)-H(5A)    | 119.5      |
| N(1)-C(6)-C(4)     | 122.67(12) |
| N(1)-C(6)-C(6)#1   | 118.57(7)  |
| C(4)-C(6)-C(6)#1   | 118.76(8)  |
| C(12)-C(7)-C(8)    | 117.56(13) |
| C(12)-C(7)-C(1)    | 120.38(12) |
| C(8)-C(7)-C(1)     | 122.05(13) |
| C(9)-C(8)-C(7)     | 121.07(14) |
| C(9)-C(8)-H(8A)    | 119.5      |
| C(7)-C(8)-H(8A)    | 119.5      |
| C(10)-C(9)-C(8)    | 120.27(13) |
| C(10)-C(9)-H(9A)   | 119.9      |
| C(8)-C(9)-H(9A)    | 119.9      |
| O(1)-C(10)-C(9)    | 122.98(13) |
| O(1)-C(10)-C(11)   | 117.61(13) |
| C(9)-C(10)-C(11)   | 119.41(13) |
| C(12)-C(11)-C(10)  | 120.22(14) |
| C(12)-C(11)-H(11A) | 119.9      |
| C(10)-C(11)-H(11A) | 119.9      |
| C(11)-C(12)-C(7)   | 121.39(13) |
| C(11)-C(12)-H(12A) | 119.3      |
| C(7)-C(12)-H(12A)  | 119.3      |

Symmetry transformations used to generate equivalent atoms:  
#1  $-x+1,y,-z+1.5$

Fig. S10 Representative structure of stereoisomers

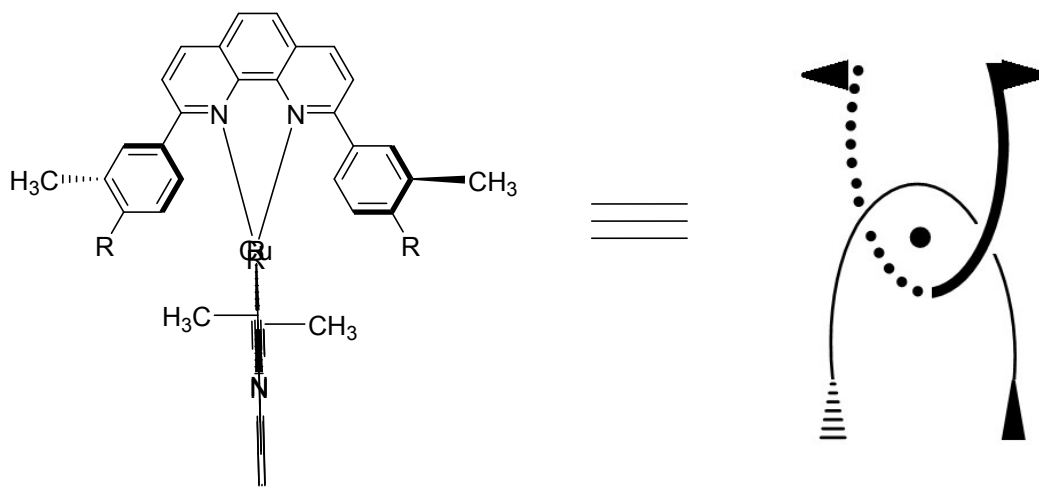

Fig. S11 Representation of stereoisomers

cis, cis isomers:

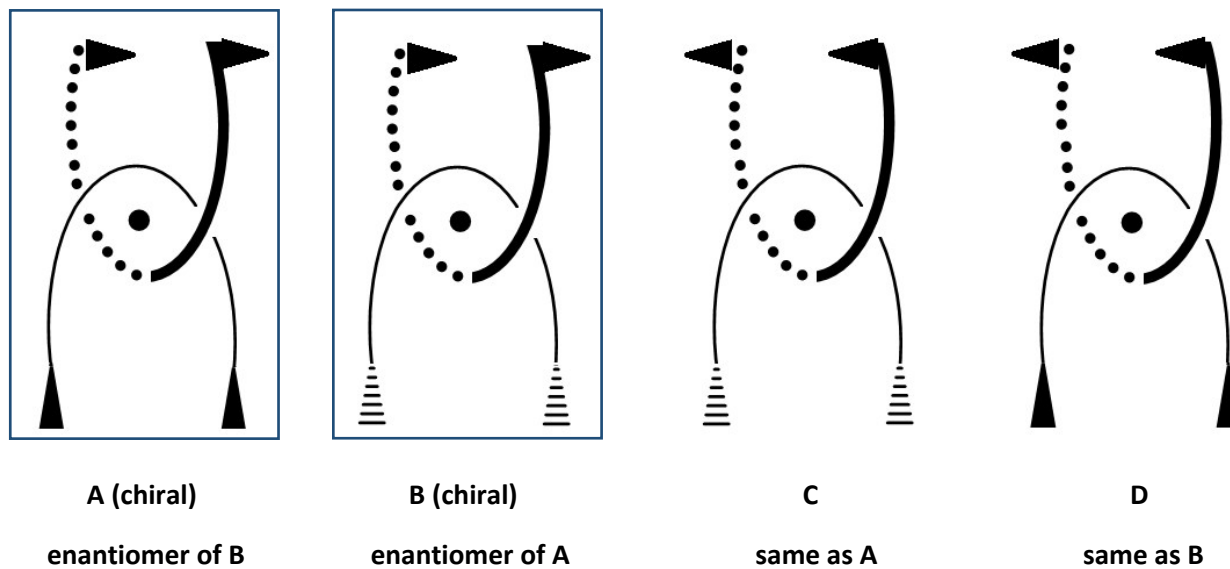



cis, trans isomers:

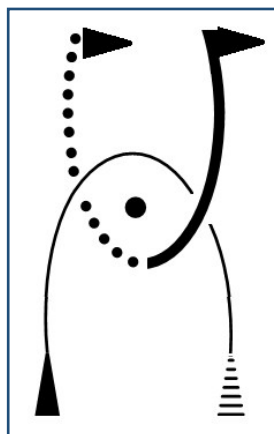

E (chiral)  
enantiomer of G

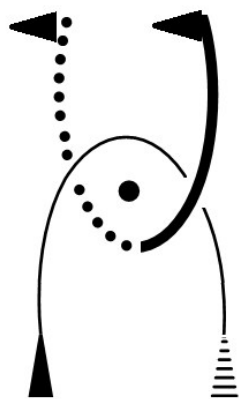

F  
same as E

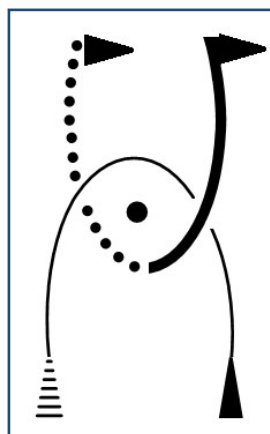

G (chiral)  
enantiomer of E

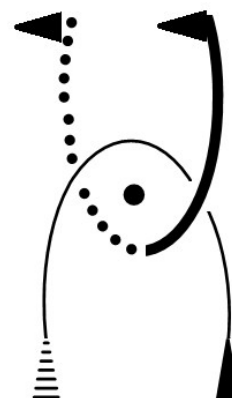

H  
same as G

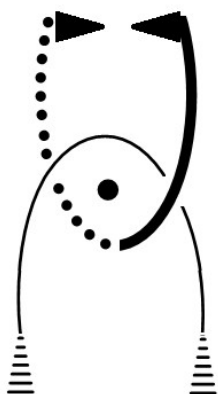

I  
same as E

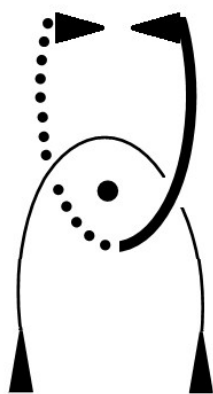

J  
same as E

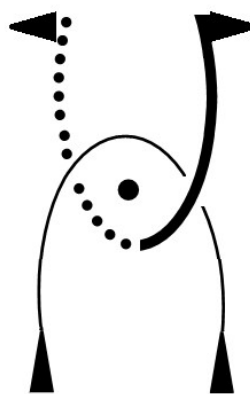

K  
same as G

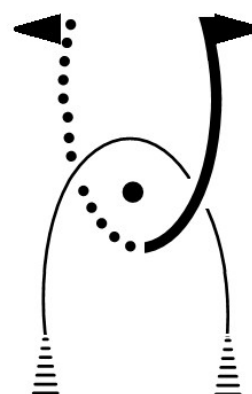

L  
same as G

trans, trans:

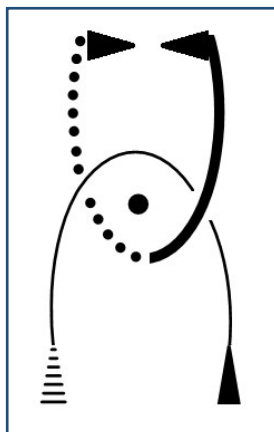

M (achiral)

diastereomer of N and O

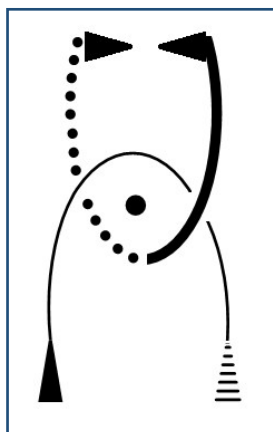

N (chiral)

enantiomer of O  
diastereomer of M

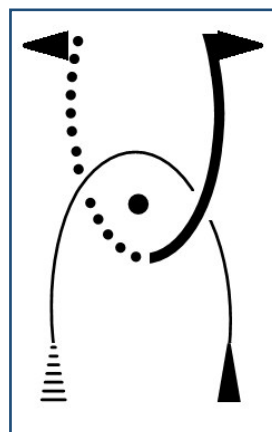

O (chiral)

enantiomer of N  
diastereomer of M

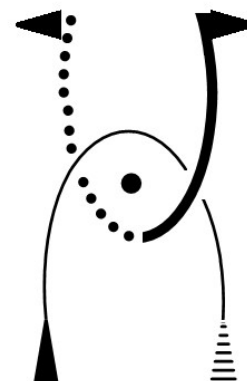

P

same as M

### Photocatalytic Experimental Setup

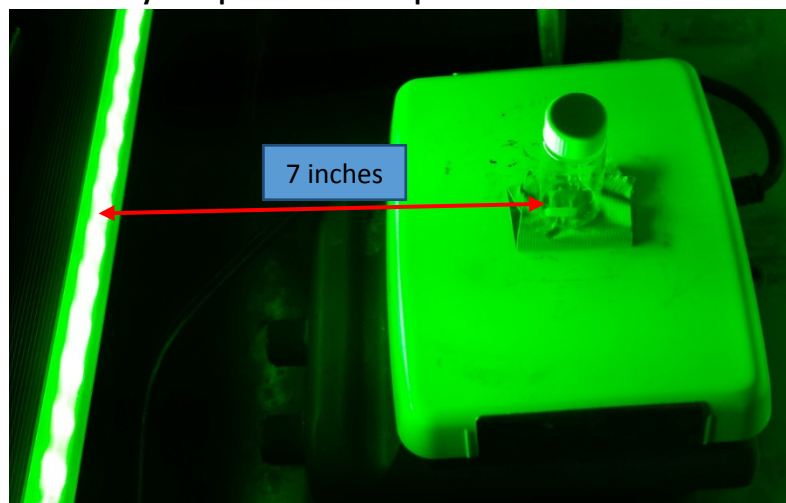

Fig. S12 Green LED light experimental setup

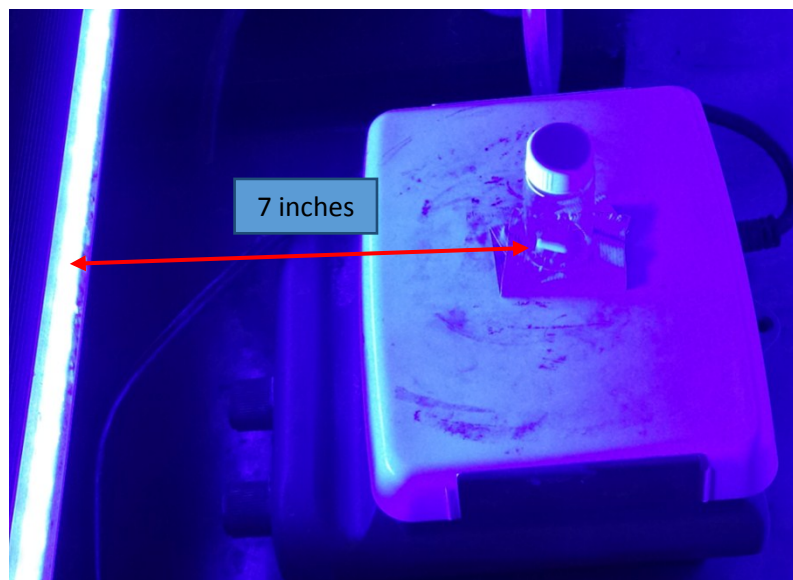

Fig. S13 Blue LED light experimental setup

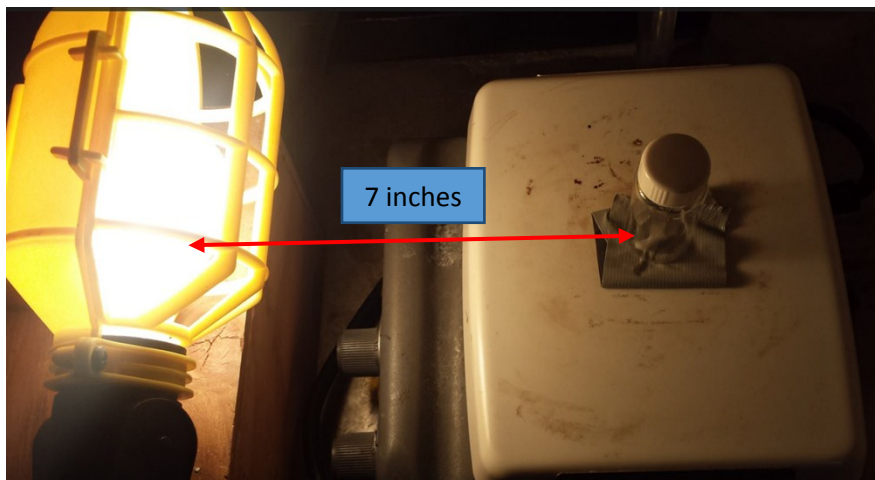

Fig. S14 White light experimental setup

**Features of LED lights (used in photoredox)**

Company where LED lights were purchased:

<http://www.bmlhorticulture.com/led-light-bar-525nm-green/>

<http://www.bmlhorticulture.com/led-light-bar-450nm-royal-blue/>

**Blue LED light (PS1230S201LLLLLLLLLLLLLLLL)**

LED Light Bar – 450 nm Royal Blue

Fixture Length : 12"

Beam Angle : 30°

**Green LED light (PS1230S201PPPPPPPPPPPPPPPP)**

LED Light Bar – 525 nm Green

Fixture Length : 12"

Beam Angle : 30°

Possible Transitions after Different LED Light Irradiation

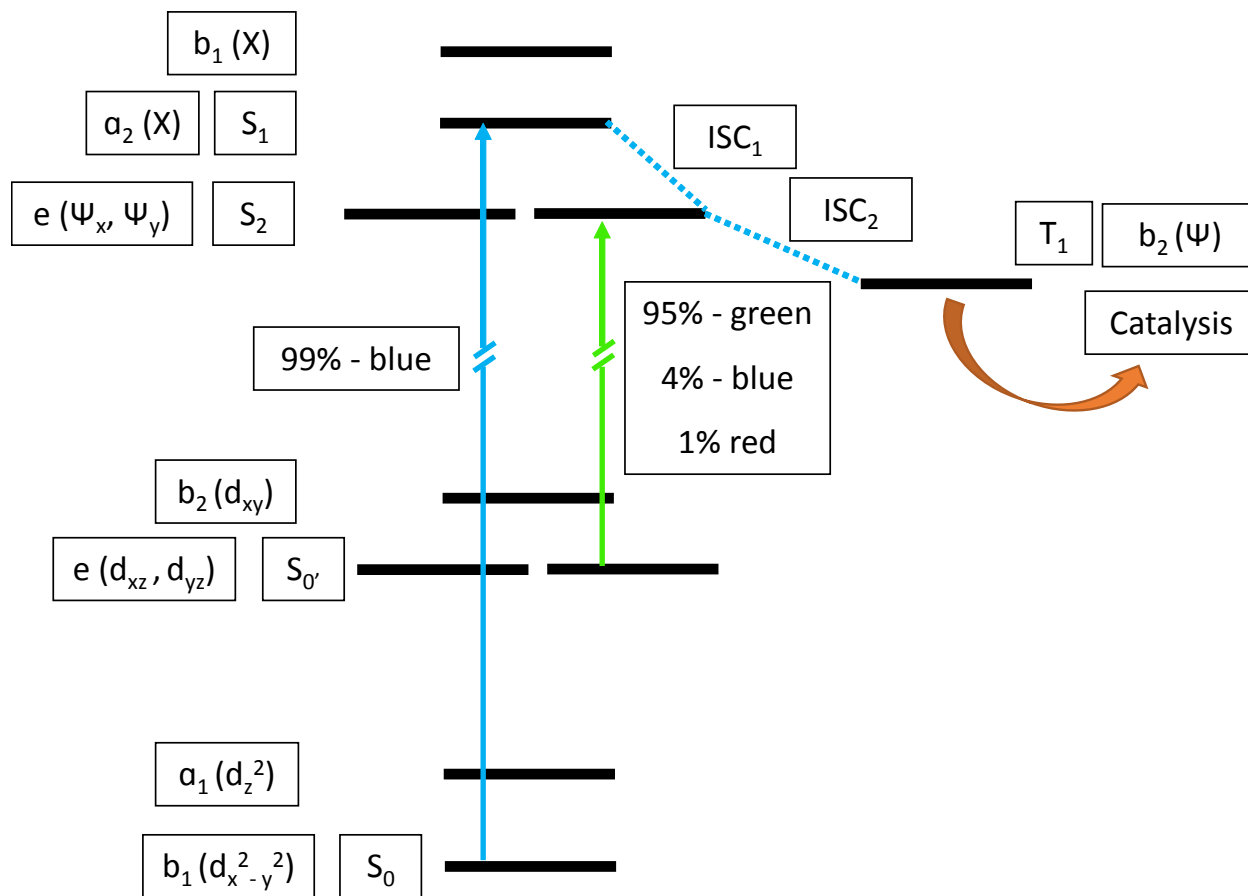

Fig. S15 Possible transitions with irradiation

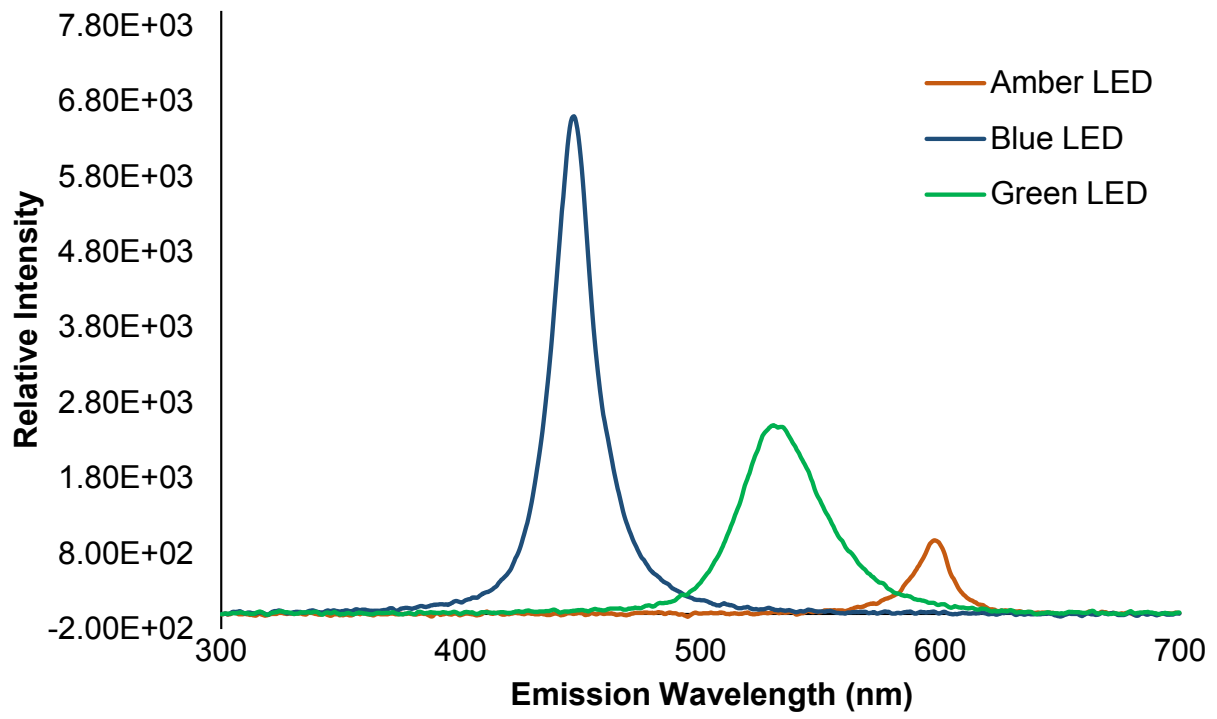

Fig. S16 Relative emission profiles of LEDs (blue LED in blue, green LED in green and orange LED in orange)

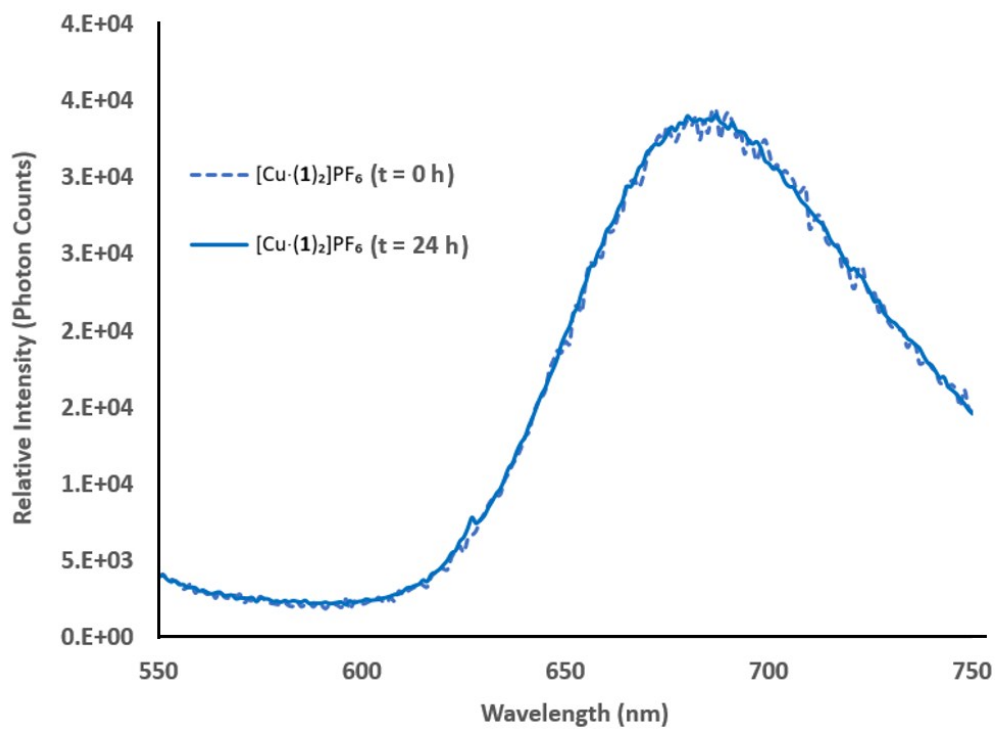

(a)

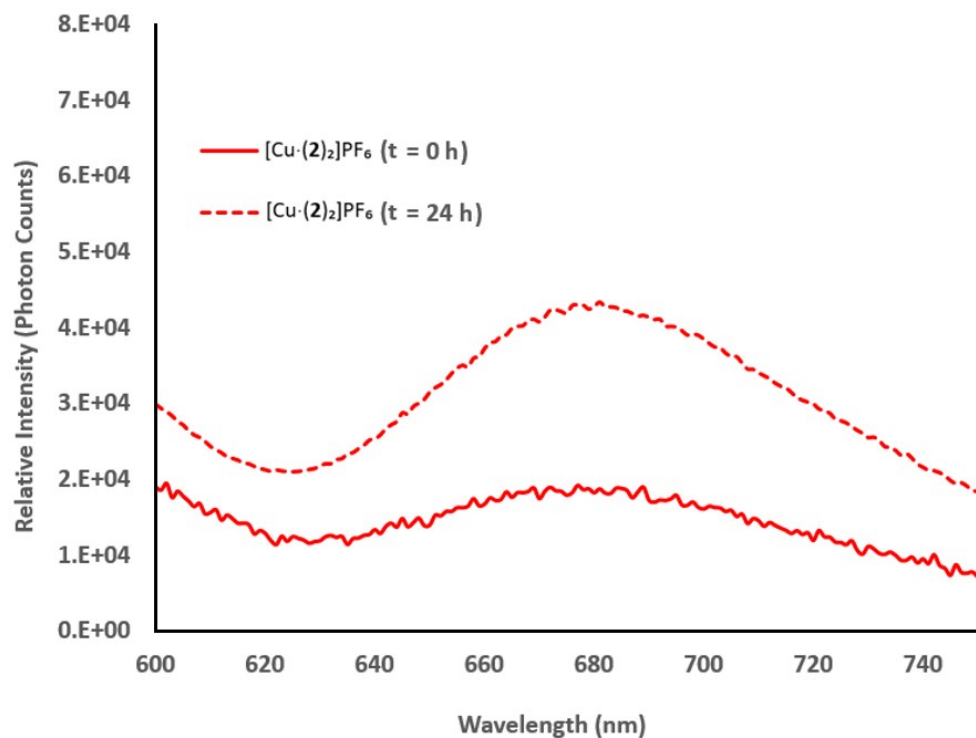

(b)

Fig. S17 Changes in emission intensity after initial dissolution of (a)  $[\text{Cu}\cdot(1)_2]\text{PF}_6$  and (b)  $[\text{Cu}\cdot(2)_2]\text{PF}_6$  in degassed DCM

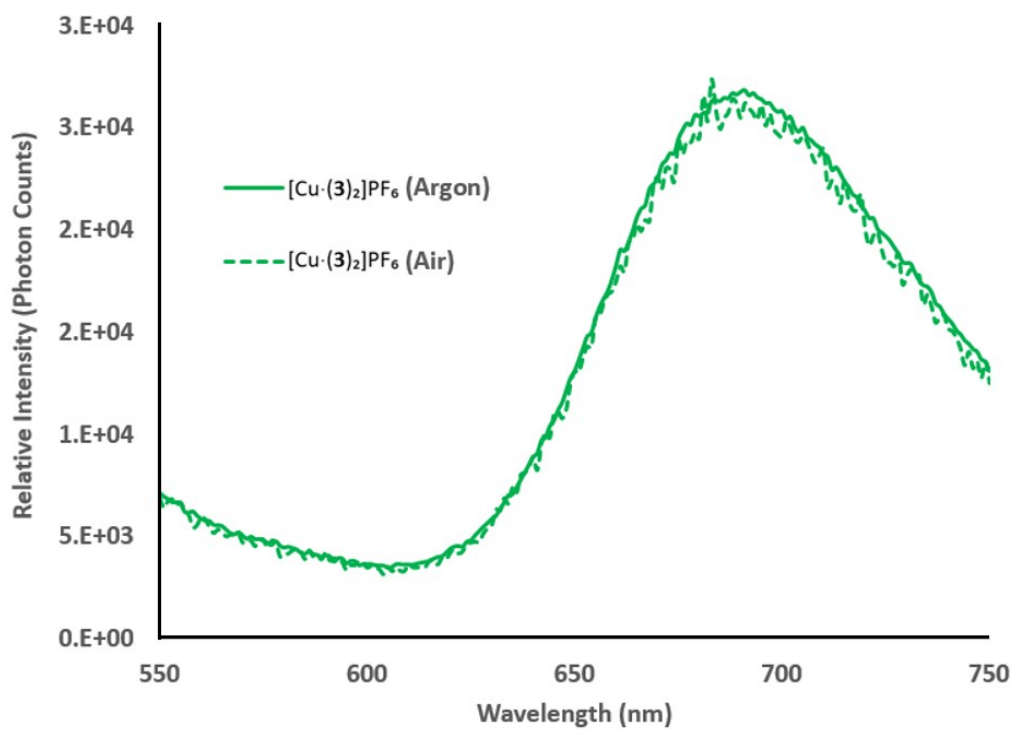

Fig. S18 Emission spectra of [Cu·(3)<sub>2</sub>]PF<sub>6</sub> before and after exposure to air
